# Supplementary material for: Imidazolium Ionic Liquids as Designer Solvents Confined in Silica Nanopores
Source: MDPI journal article supplement (doi:10.3390/gels8060388), 2022-06-19
Supplement: s1 [file s1]

## *Supplementary Materials*

### **Imidazolium ionic liquids as designer solvents confined in silica nanopores**

Ana-Maria Putz, Adél Len, László Trif, Zsolt Endre Horváth and László Almásy

#### Content

1. SEM micrographs of the IL – silica nanocomposites
2. EDS spectra of the IL – silica nanocomposites

1. SEM micrographs of the IL – silica nanocomposites

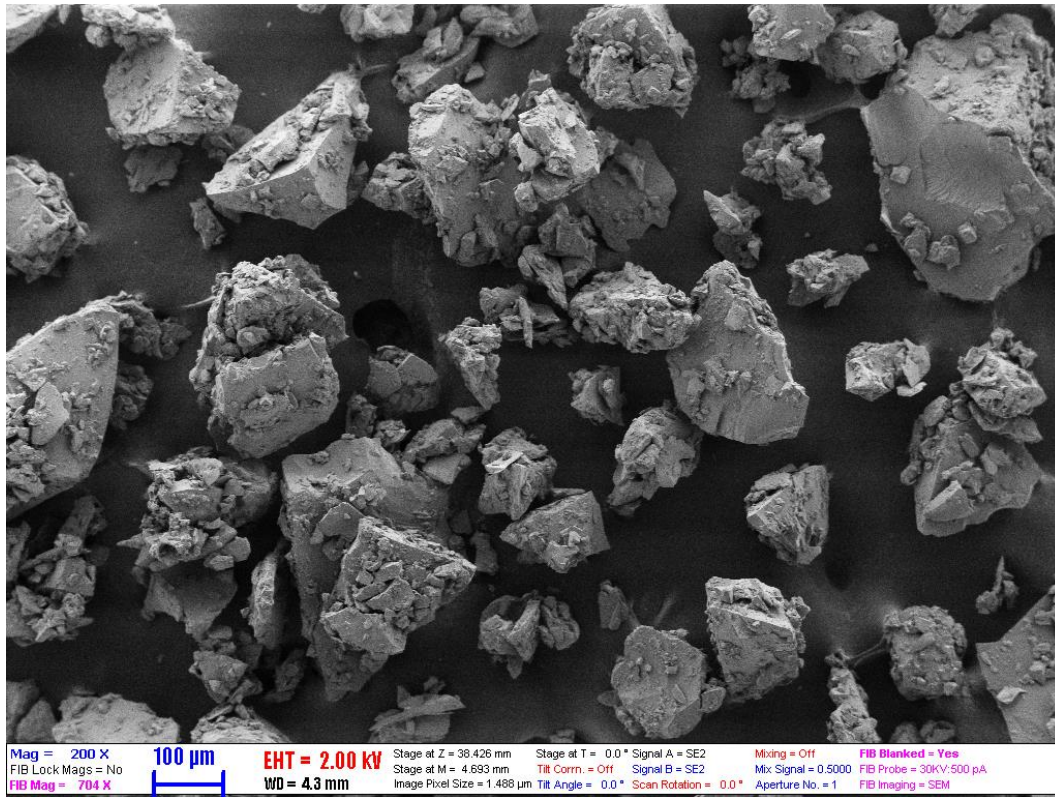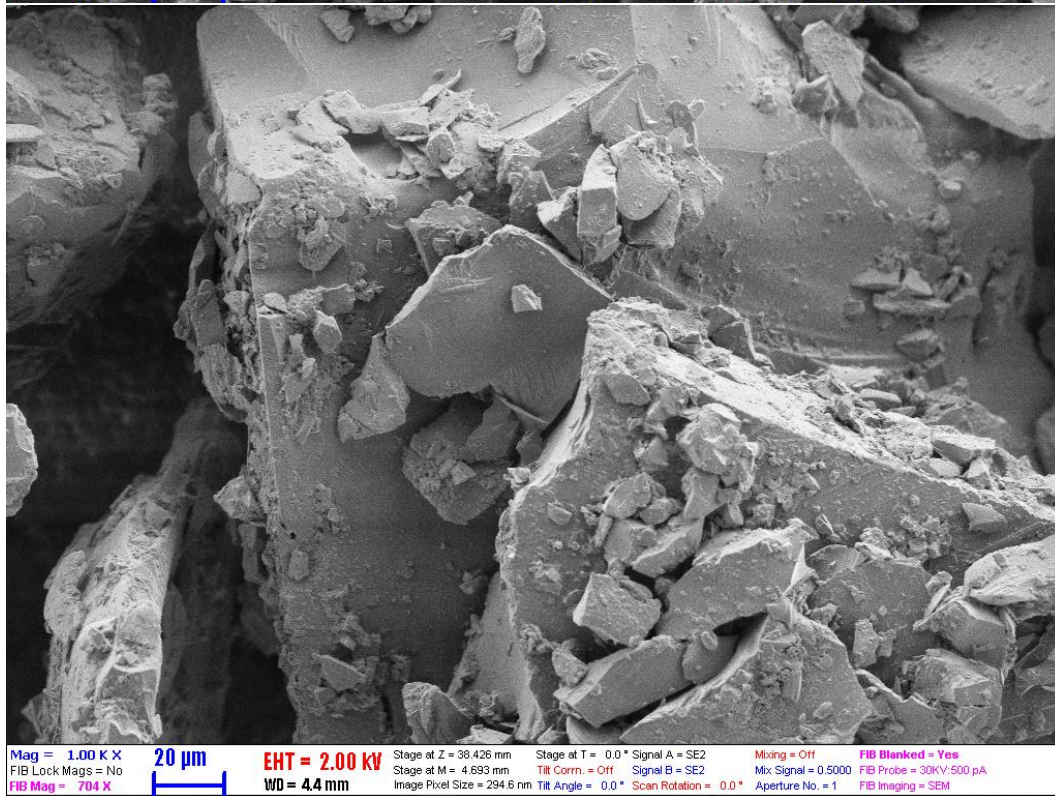



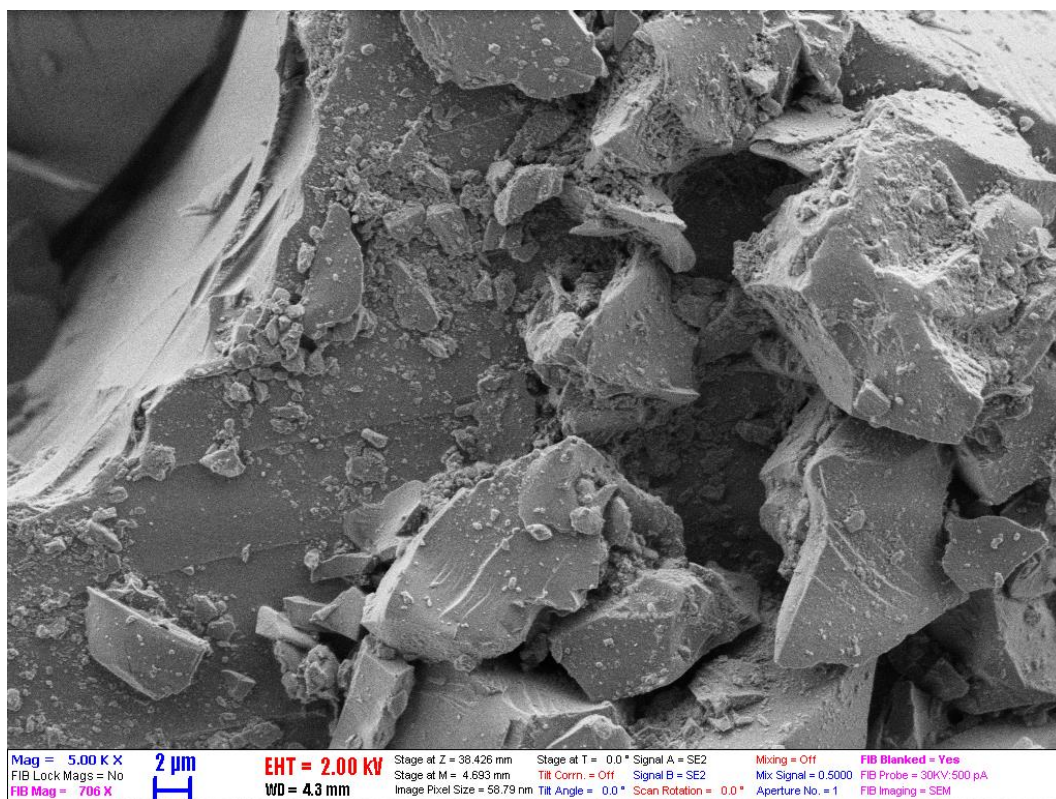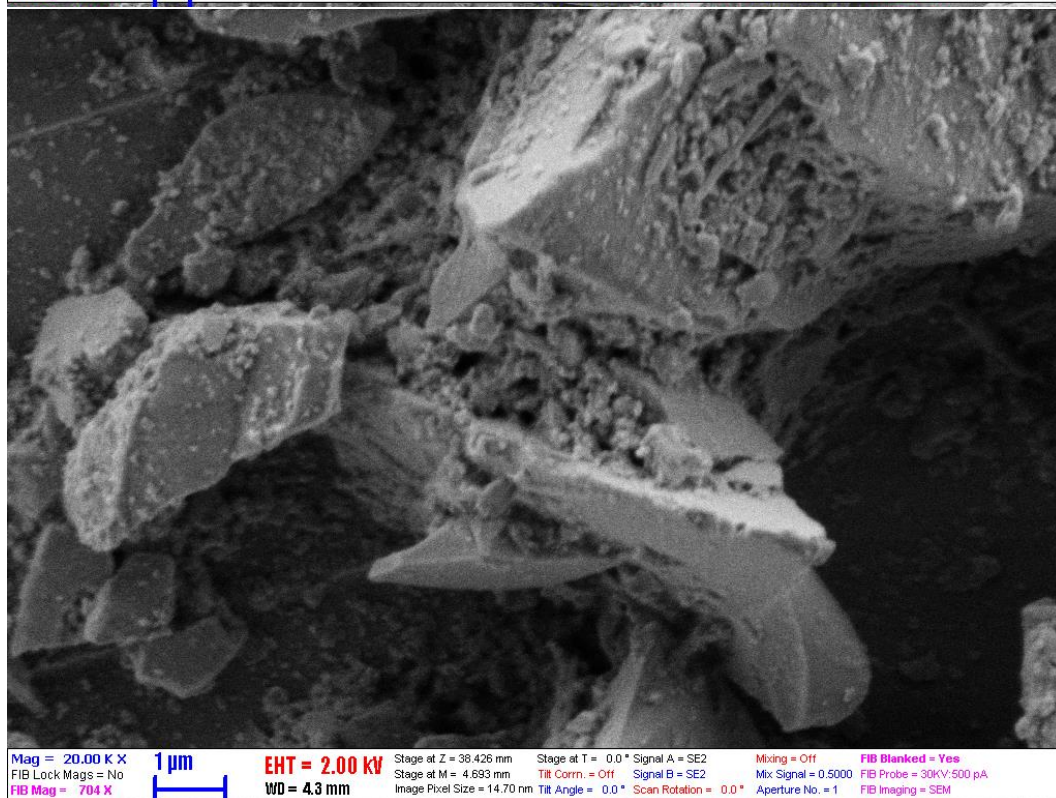



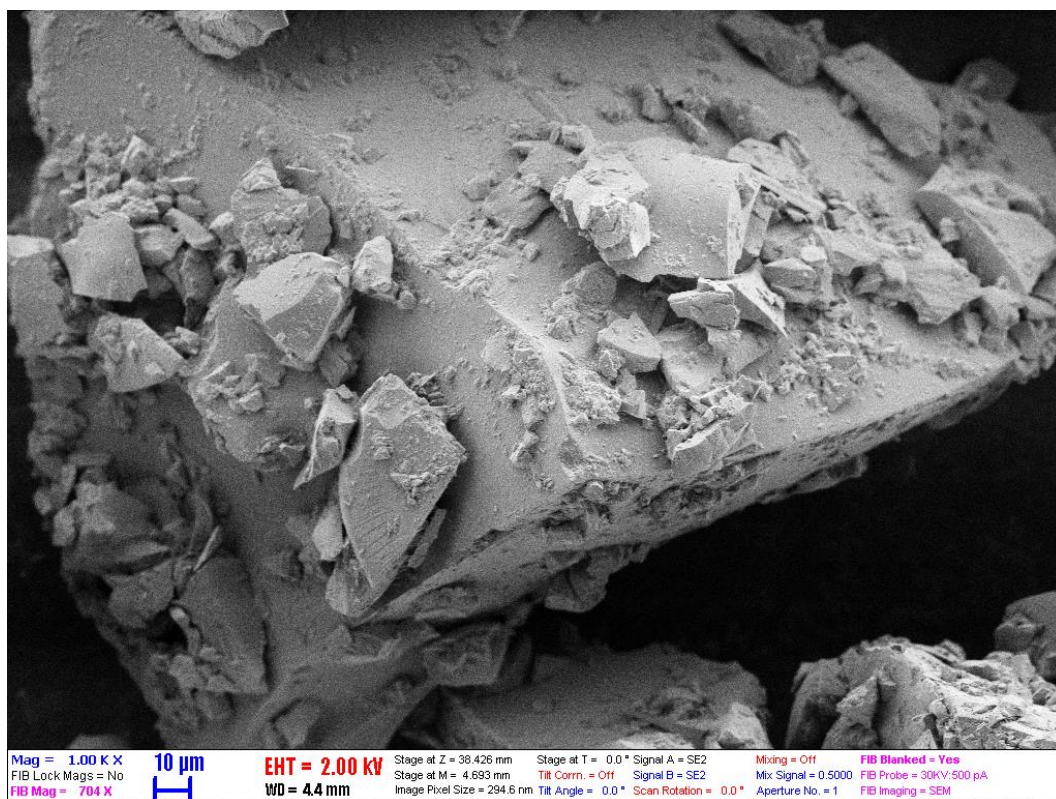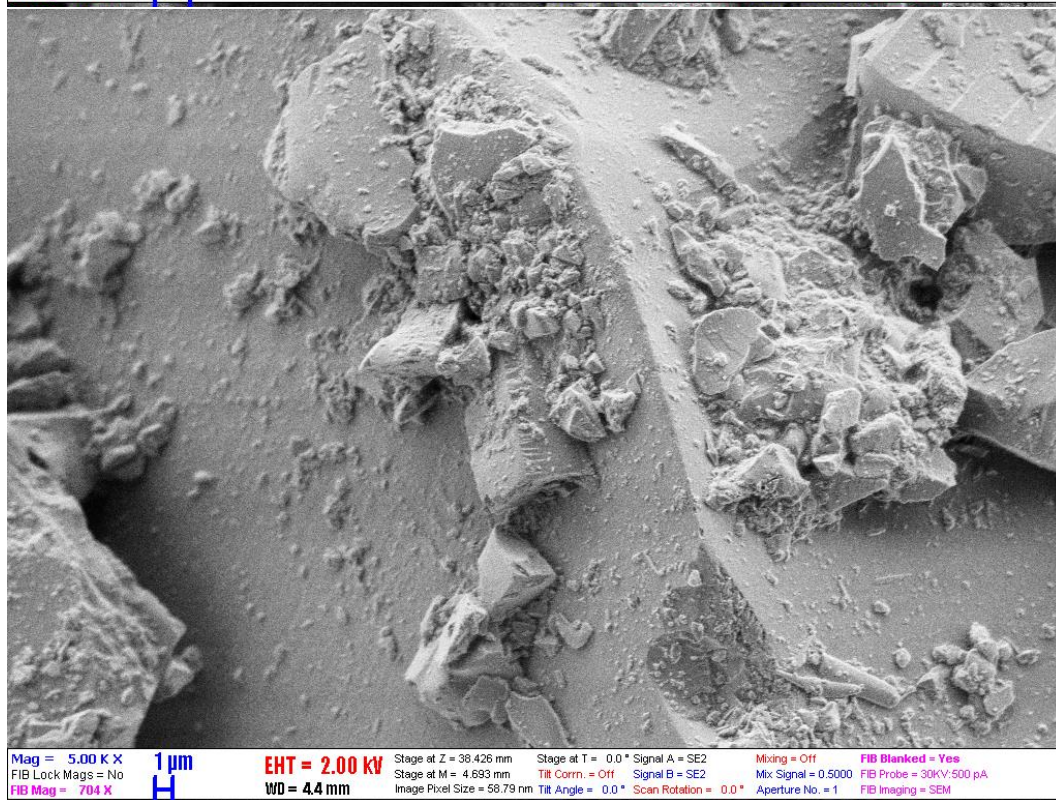



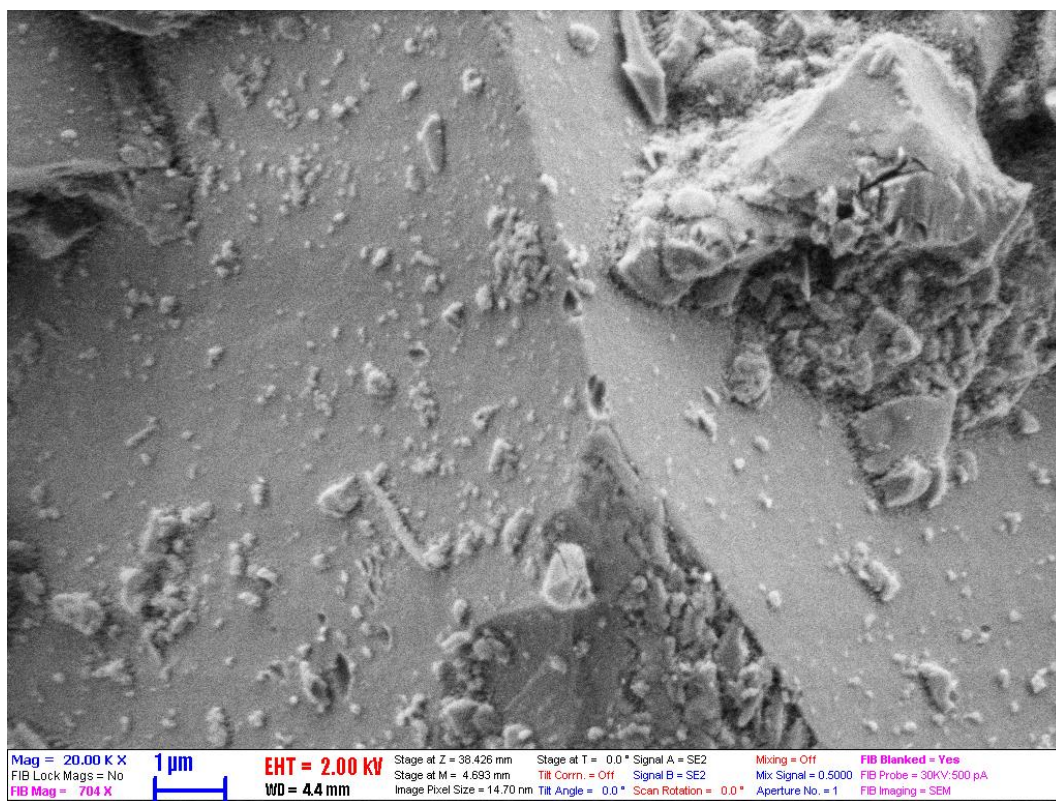

Figure S1 IM-0

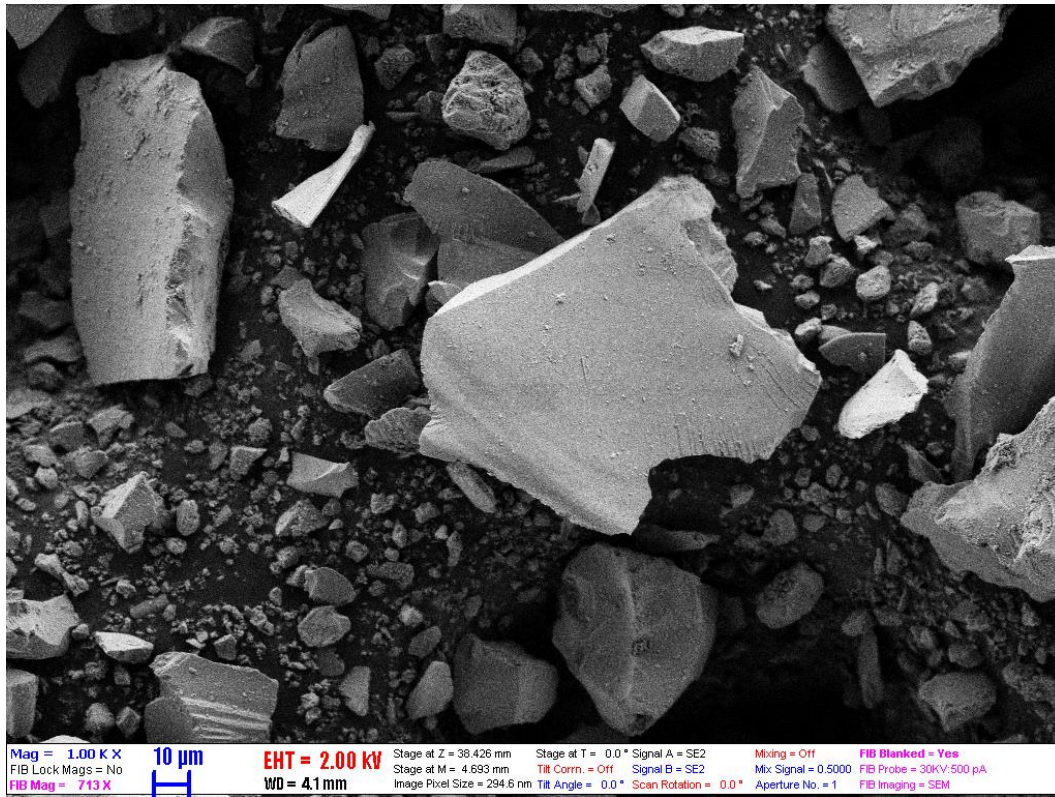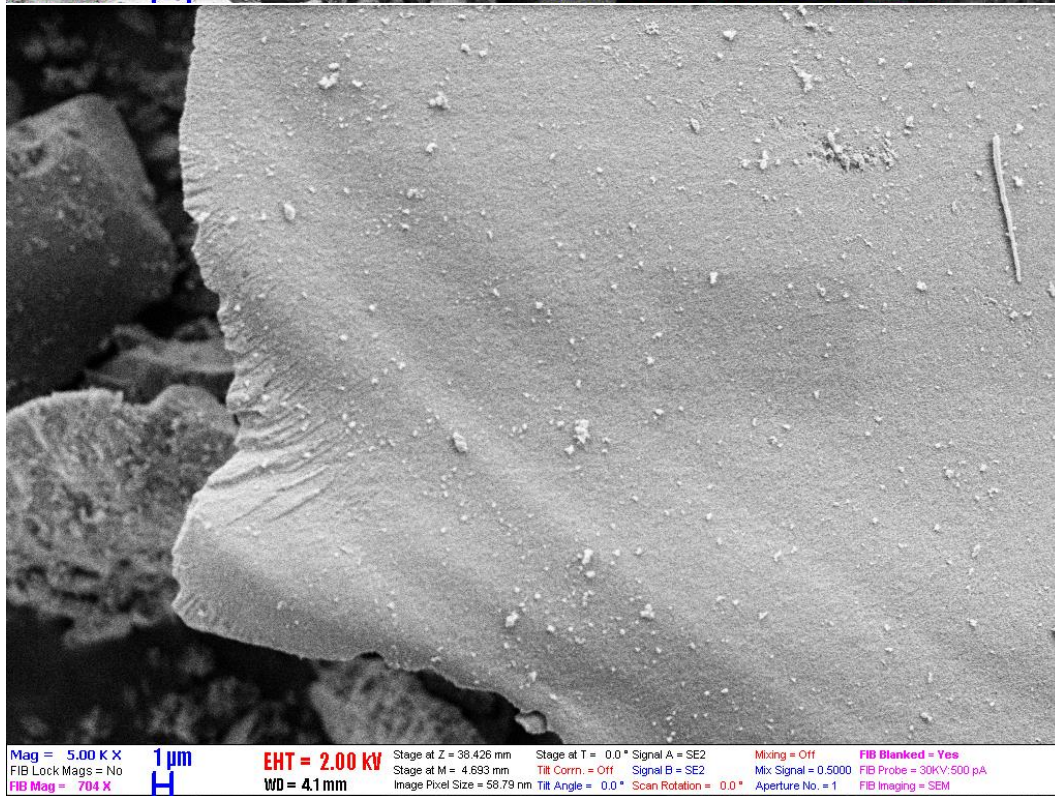



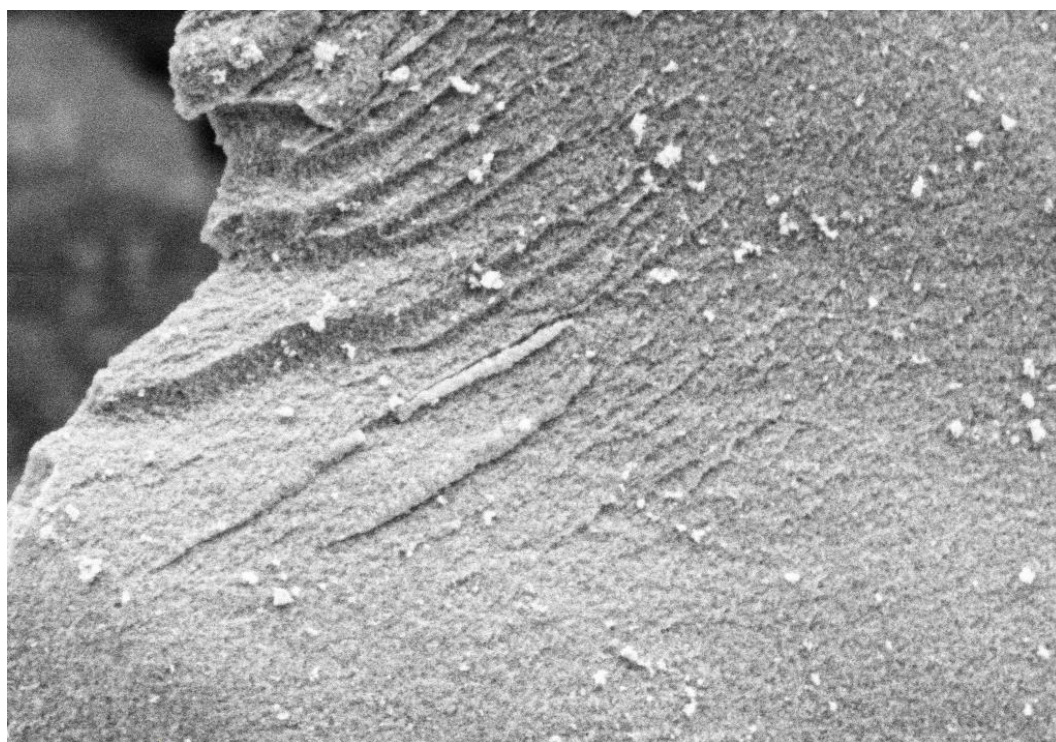

|                    |           |               |                             |                    |                       |                     |                         |
|--------------------|-----------|---------------|-----------------------------|--------------------|-----------------------|---------------------|-------------------------|
| Mag = 20.00 K X    | 1 $\mu$ m | EHT = 2.00 kV | Stage at Z = 38.426 mm      | Stage at T = 0.0 ° | Signal A = SE2        | Mixing = Off        | FIB Blanked = Yes       |
| FIB Lock Mags = No |           | WD = 4.1 mm   | Stage at M = 4.693 mm       | Tilt Corr. = Off   | Signal B = SE2        | Mix Signal = 0.5000 | FIB Probe = 30KV-500 pA |
| FIB Mag = 704 X    |           |               | Image Pixel Size = 14.70 nm | Tilt Angle = 0.0 ° | Scan Rotation = 0.0 ° | Aperture No. = 1    | FIB Imaging = SEM       |

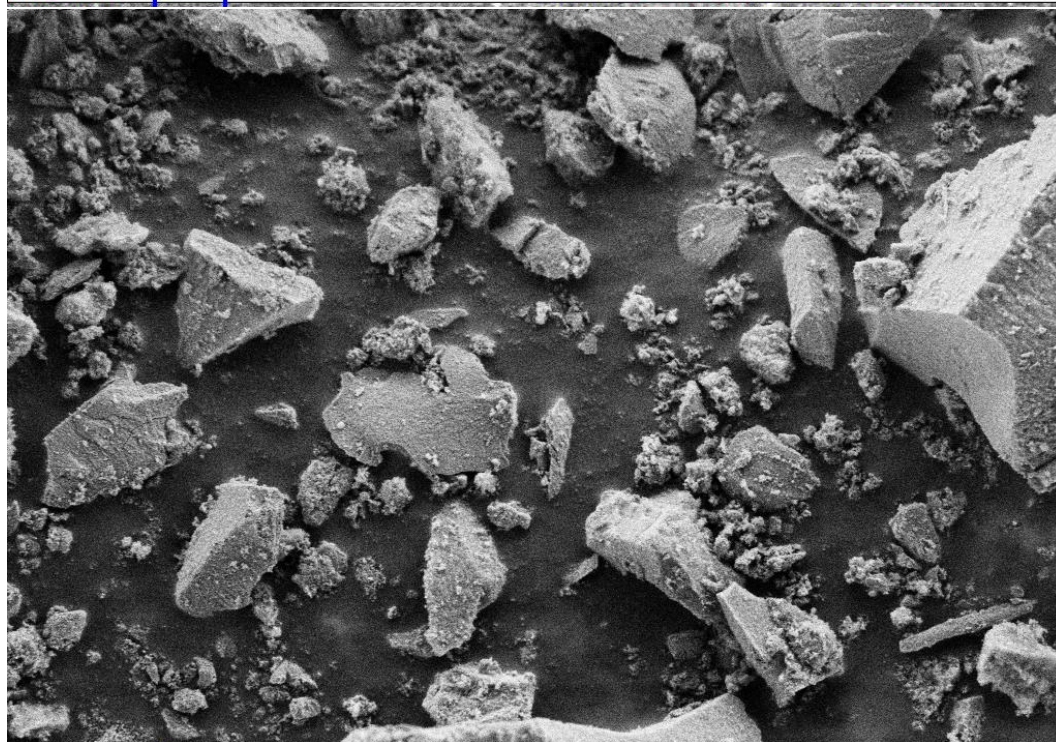

|                    |           |               |                             |                    |                       |                     |                         |
|--------------------|-----------|---------------|-----------------------------|--------------------|-----------------------|---------------------|-------------------------|
| Mag = 5.00 K X     | 1 $\mu$ m | EHT = 2.00 kV | Stage at Z = 38.426 mm      | Stage at T = 0.0 ° | Signal A = SE2        | Mixing = Off        | FIB Blanked = Yes       |
| FIB Lock Mags = No |           | WD = 4.2 mm   | Stage at M = 4.693 mm       | Tilt Corr. = Off   | Signal B = SE2        | Mix Signal = 0.5000 | FIB Probe = 30KV-500 pA |
| FIB Mag = 704 X    |           |               | Image Pixel Size = 58.79 nm | Tilt Angle = 0.0 ° | Scan Rotation = 0.0 ° | Aperture No. = 1    | FIB Imaging = SEM       |



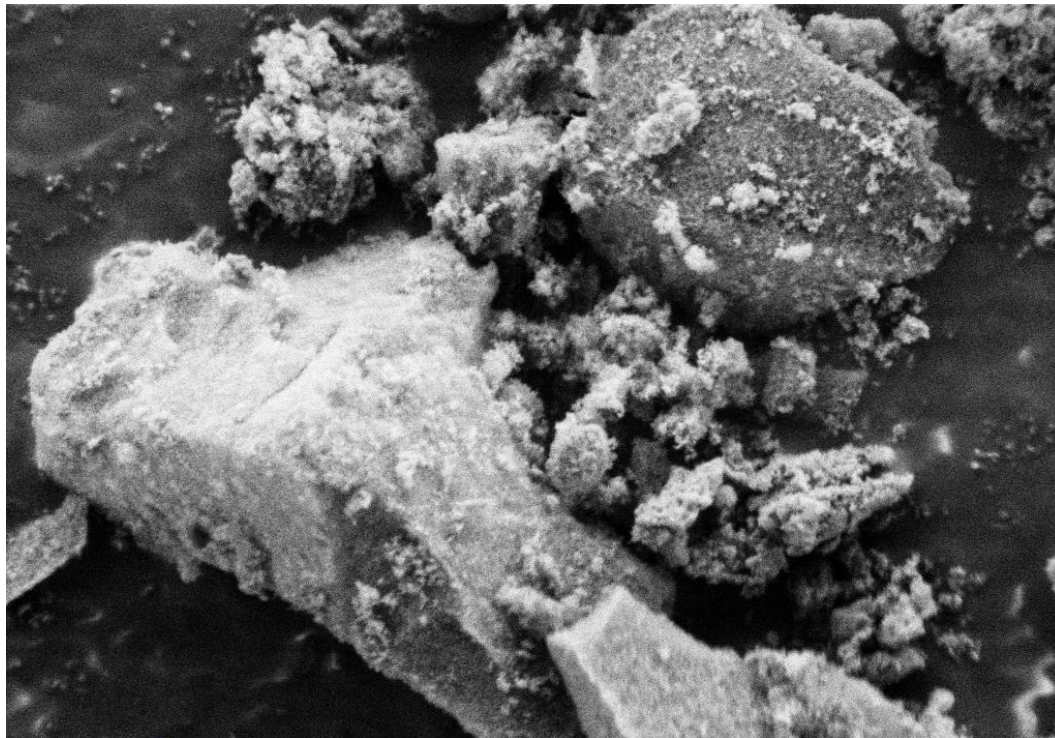

Mag = 20.00 K X    1  $\mu$ m    EHT = 2.00 kV    Stage at Z = 38.426 mm    Stage at T = 0.0°    Signal A = SE2    Mixing = Off    FIB Blanked = Yes  
 FIB Lock Mags = No    FIB Mag = 704 X    WD = 4.2 mm    Stage at M = 4.693 mm    Image Pixel Size = 14.70 nm    Tilt Corr. = Off    Signal B = SE2    Mix Signal = 0.5000    FIB Probe = 30KV-500 pA  
 Tilt Angle = 0.0°    Scan Rotation = 0.0°    Aperture No. = 1    FIB Imaging = SEM

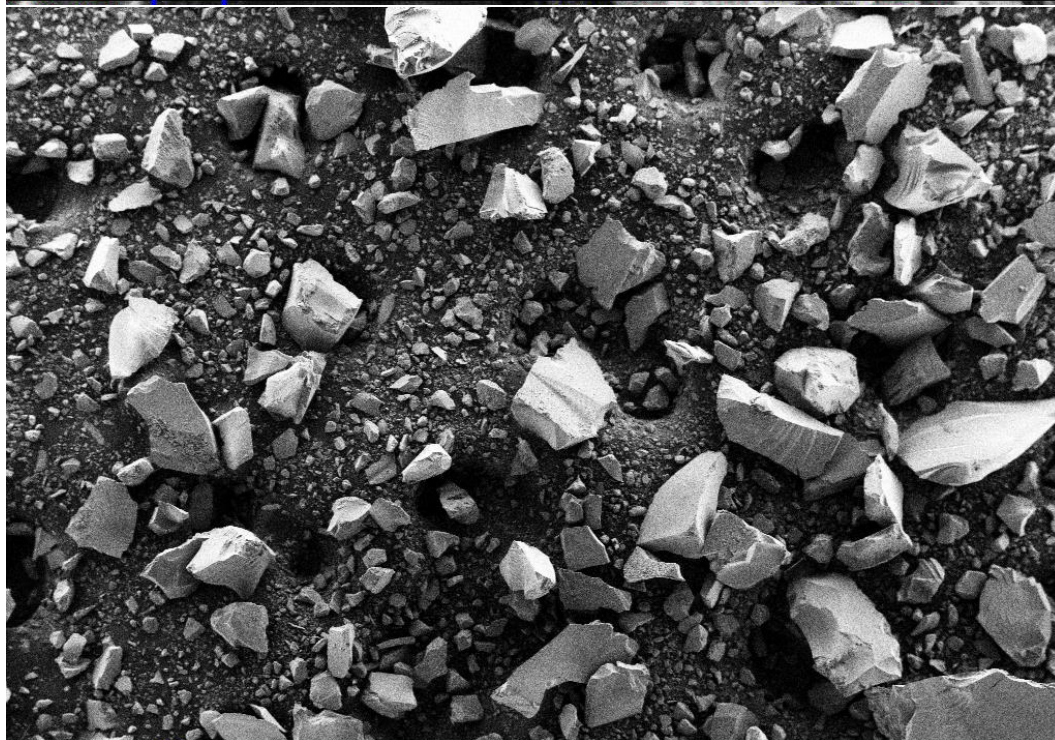

Mag = 200 X    100  $\mu$ m    EHT = 2.00 kV    Stage at Z = 38.426 mm    Stage at T = 0.0°    Signal A = SE2    Mixing = Off    FIB Blanked = Yes  
 FIB Lock Mags = No    FIB Mag = 704 X    WD = 4.0 mm    Stage at M = 4.693 mm    Image Pixel Size = 1.488  $\mu$ m    Tilt Corr. = Off    Signal B = SE2    Mix Signal = 0.5000    FIB Probe = 30KV-500 pA  
 Tilt Angle = 0.0°    Scan Rotation = 0.0°    Aperture No. = 1    FIB Imaging = SEM



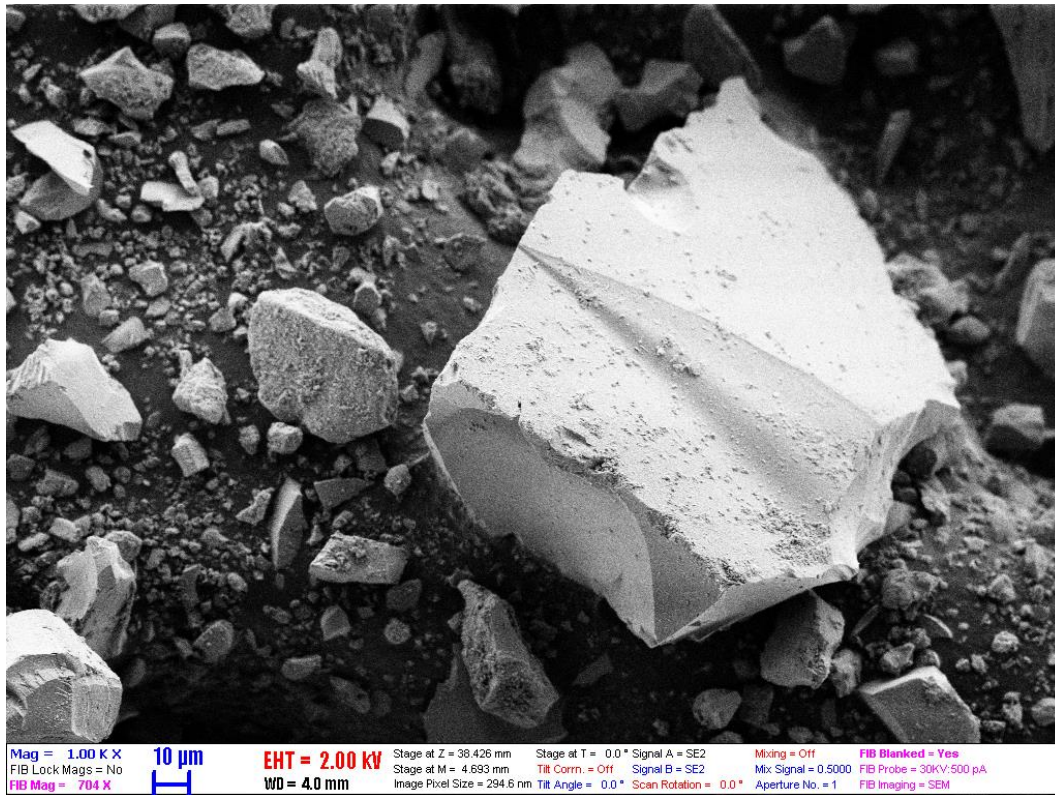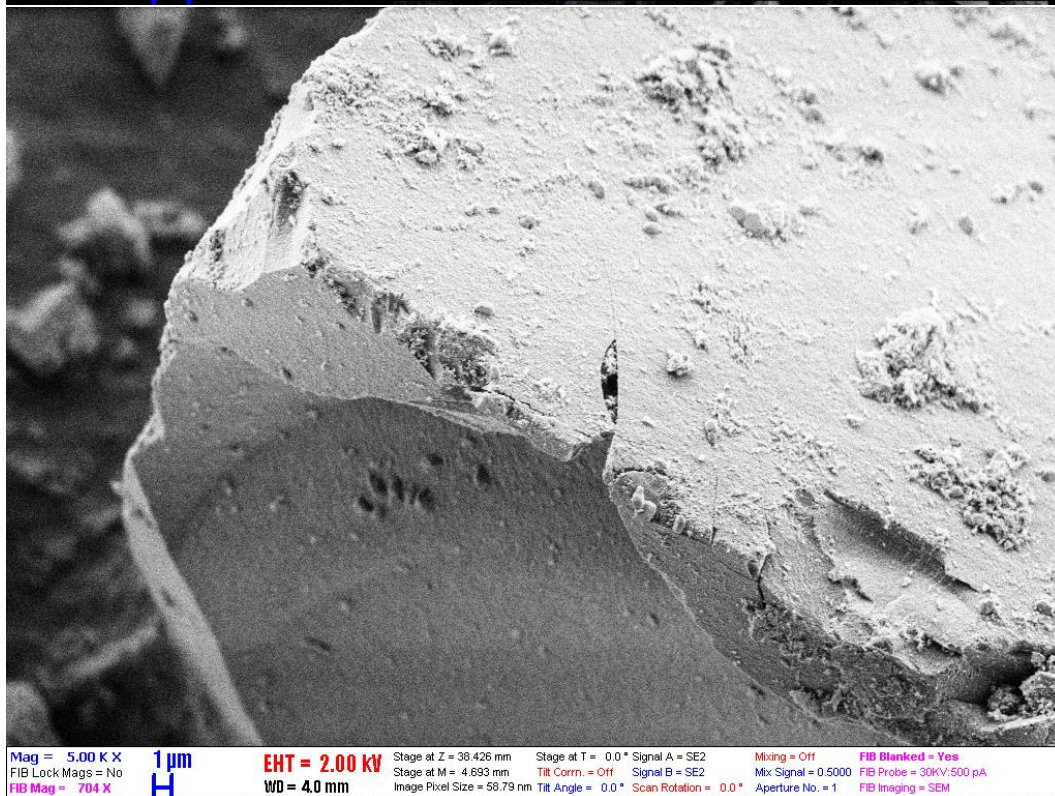



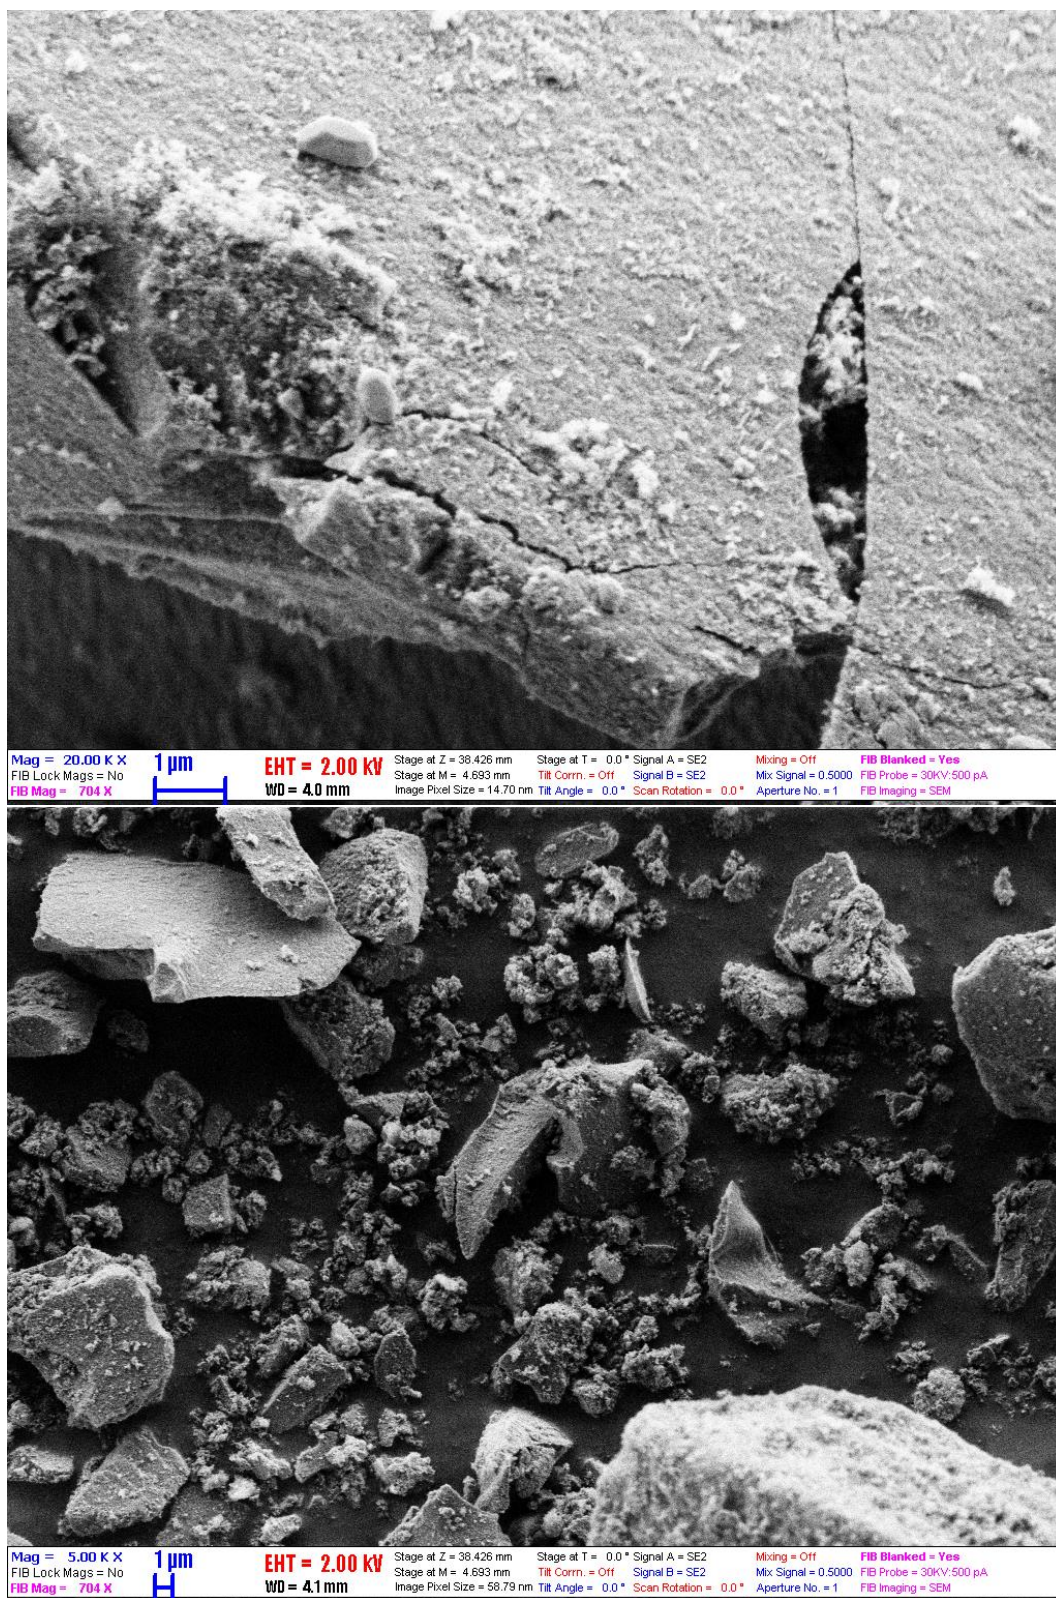

Figure S2. IM-BF4-0.1



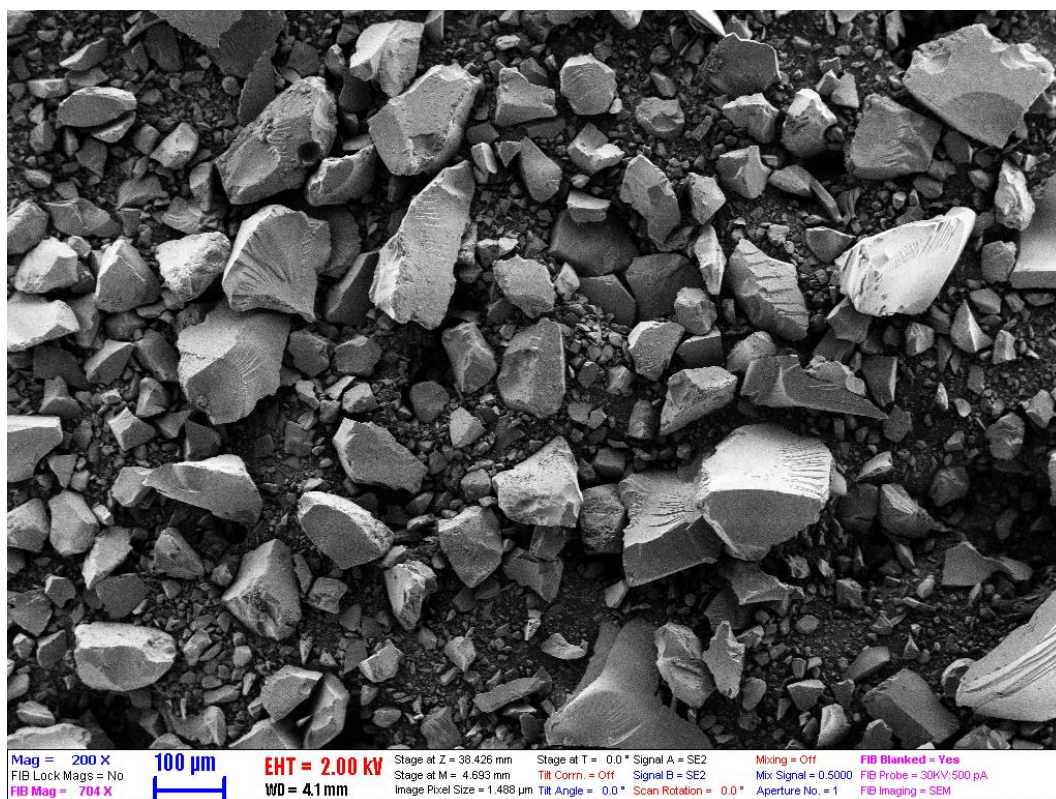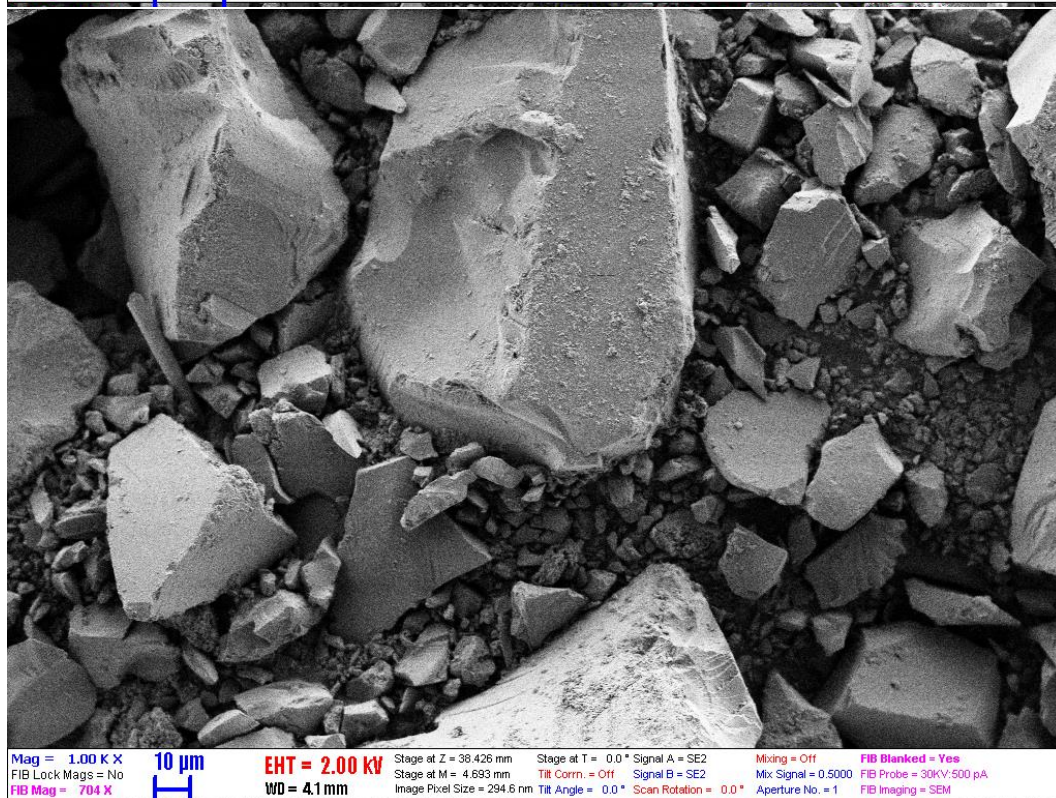



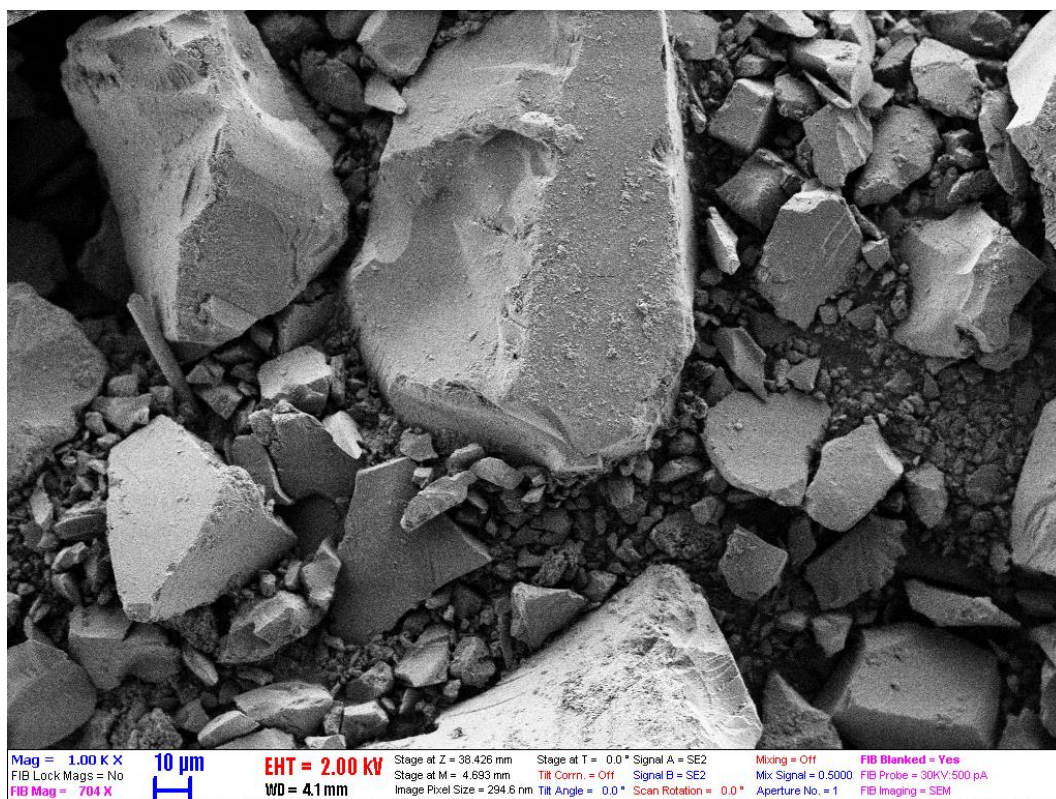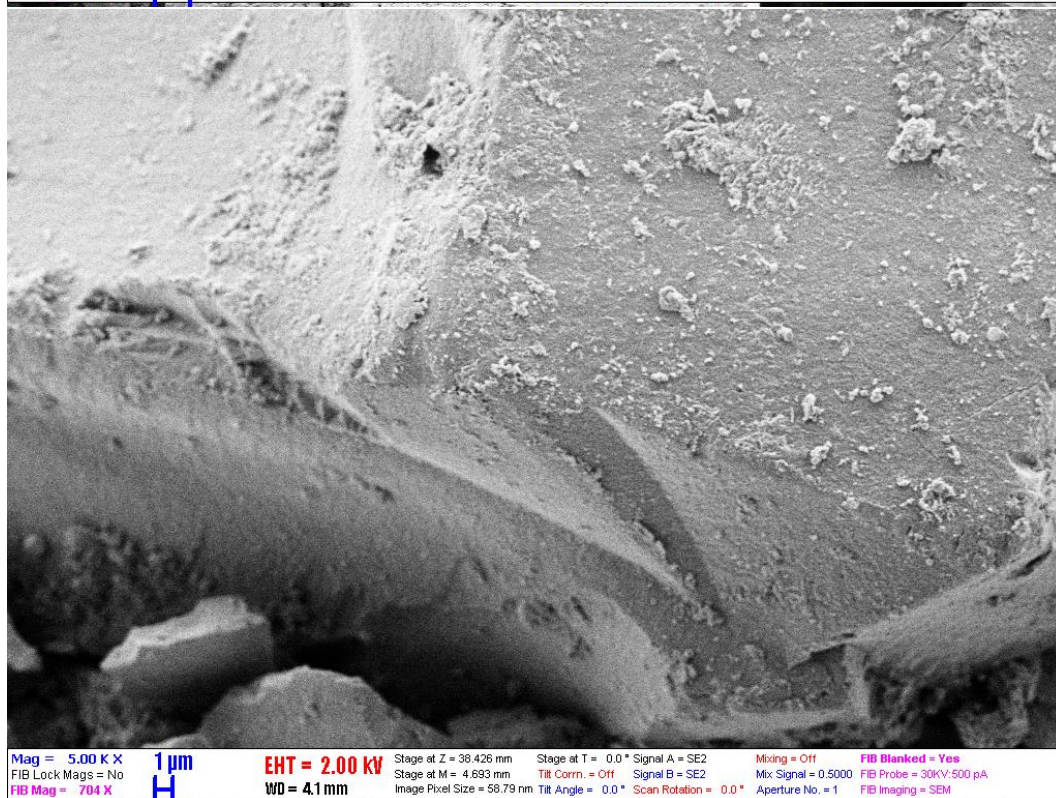



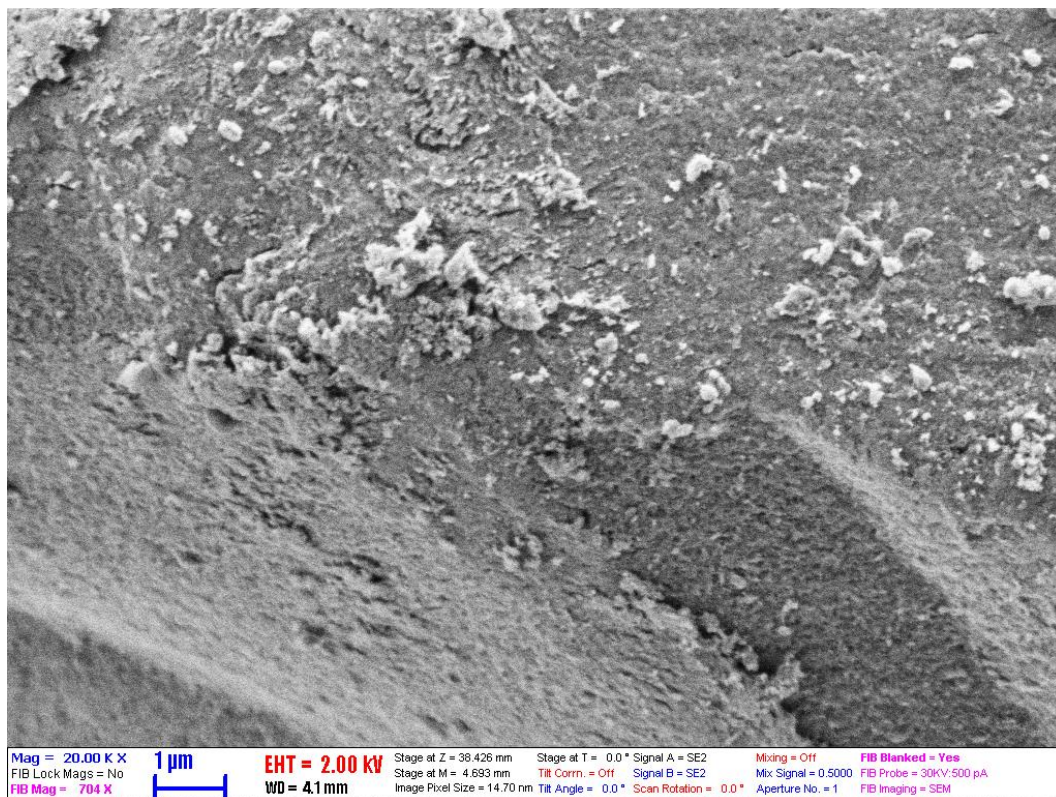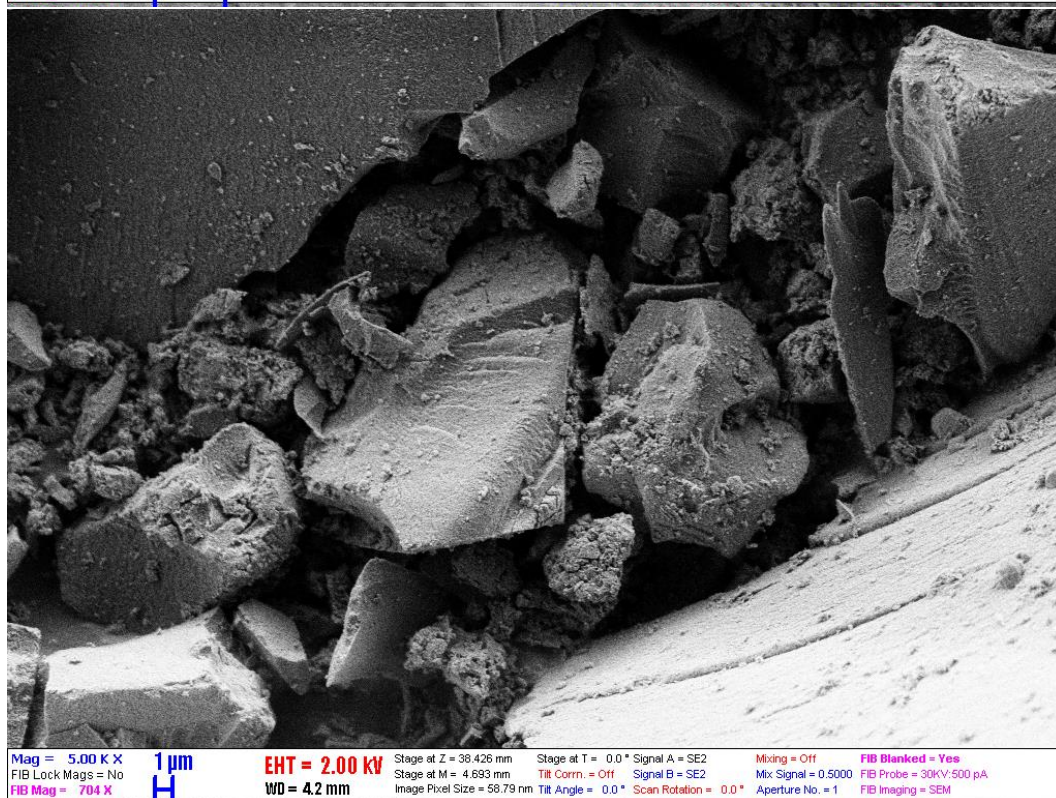



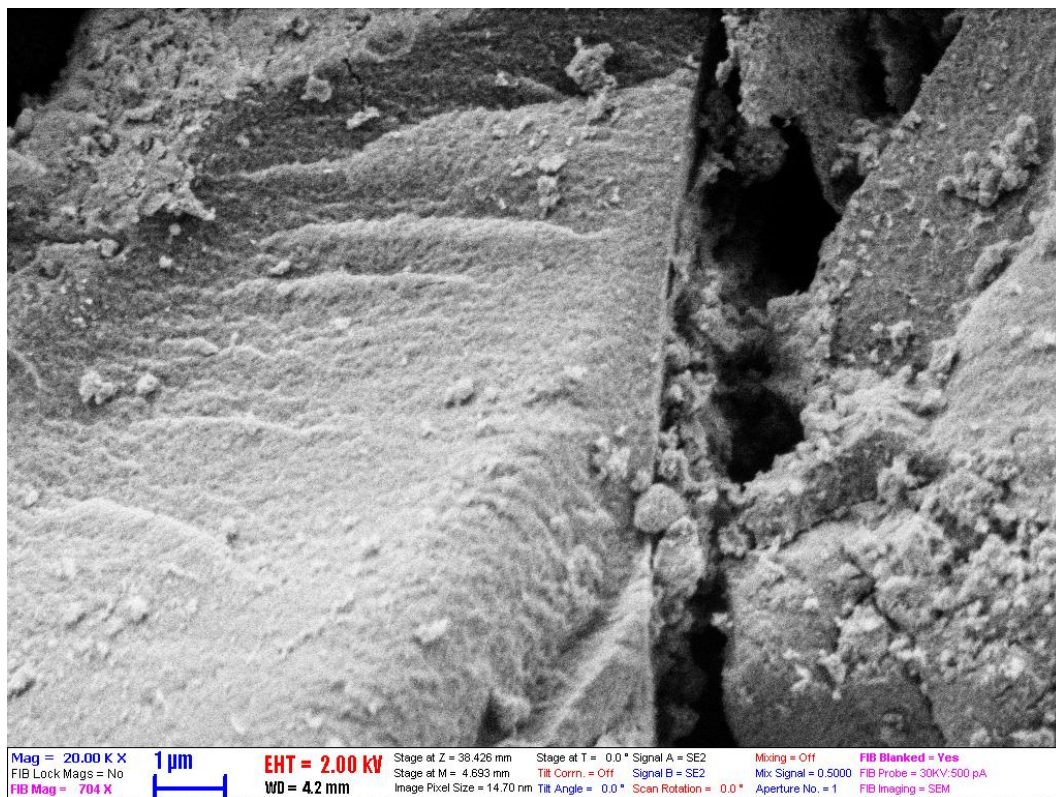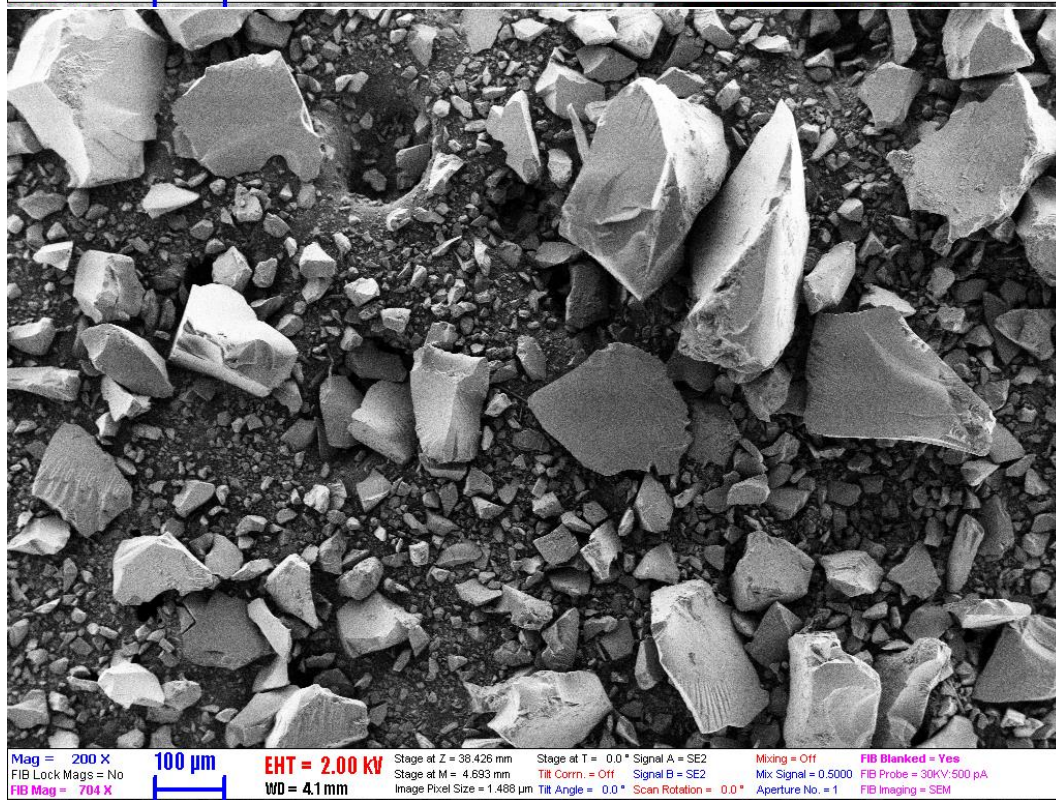



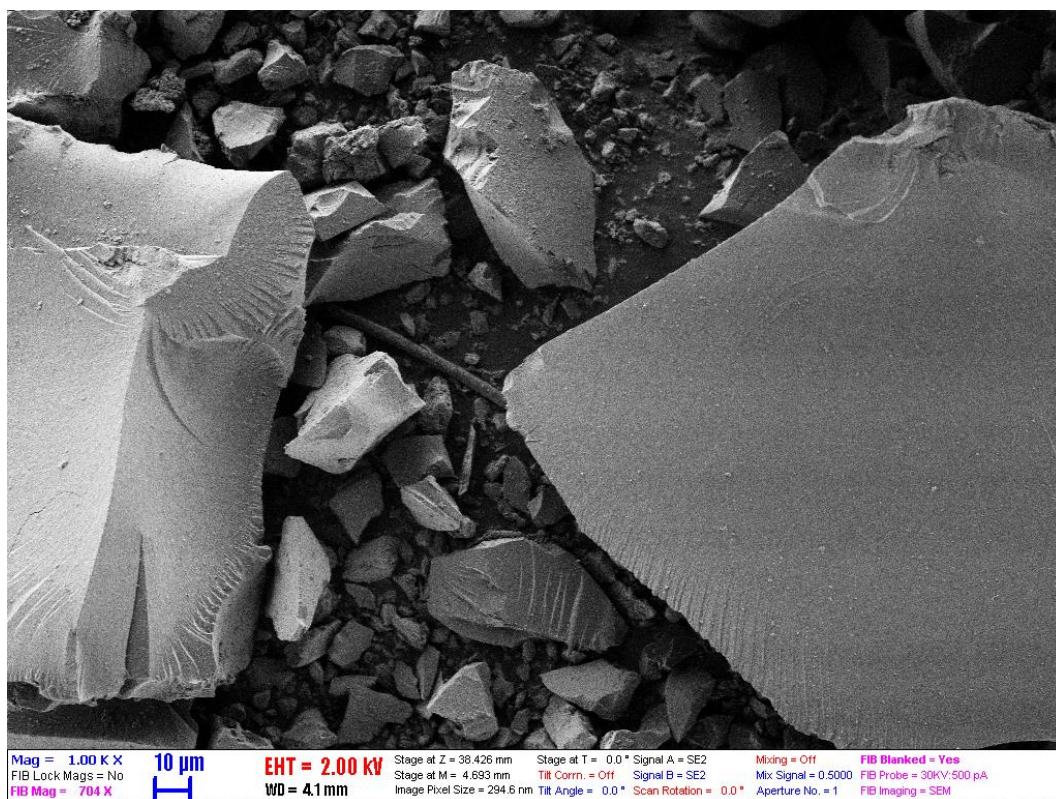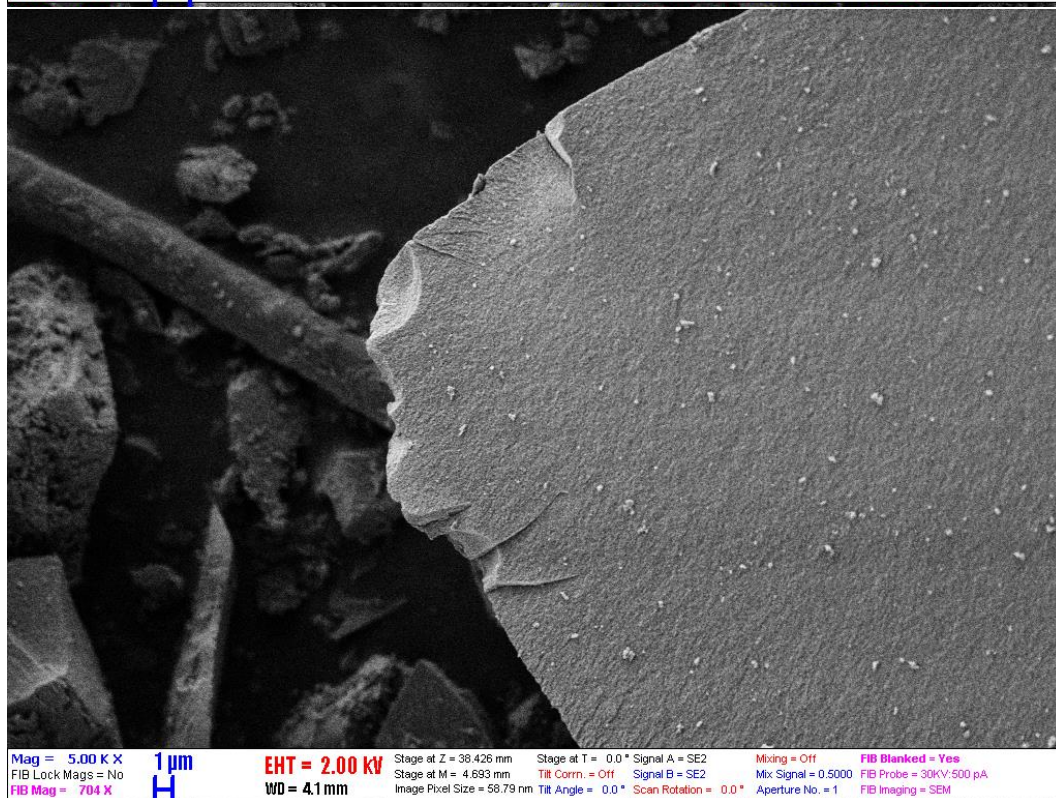



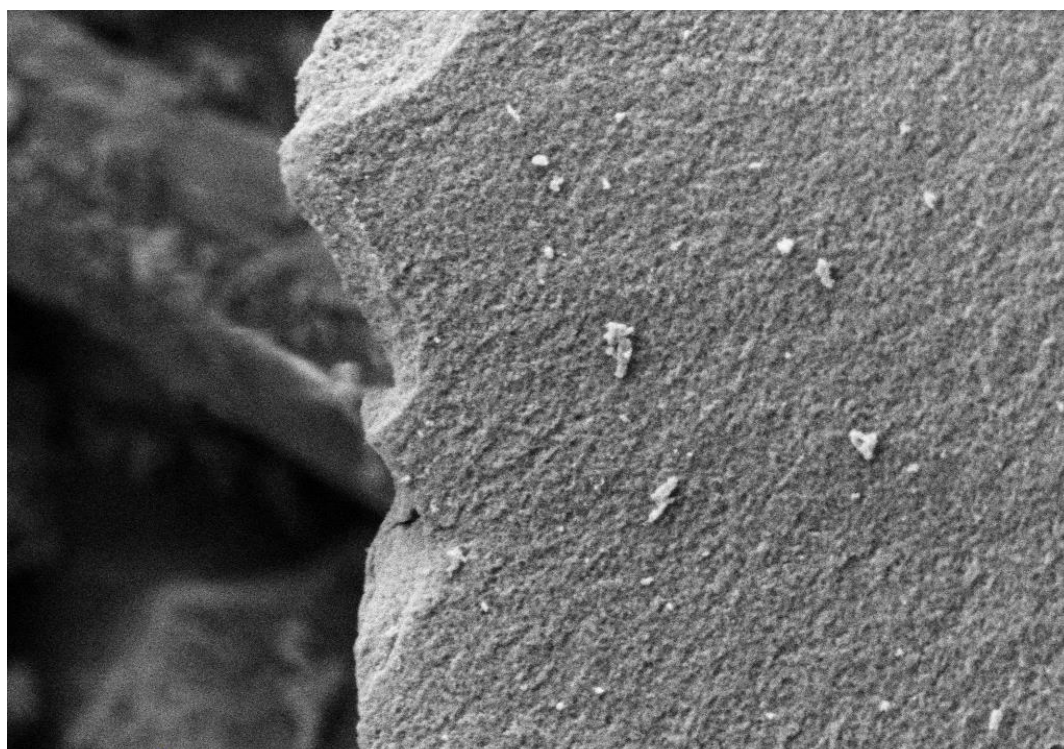

Mag = 20.00 K X    1  $\mu$ m    EHT = 2.00 kV    Stage at Z = 38.426 mm    Stage at T = 0.0°    Signal A = SE2    Mixing = Off    FIB Blanked = Yes  
 FIB Lock Mags = No    WD = 4.1 mm    Stage at M = 4.693 mm    Tilt Corr. = Off    Signal B = SE2    Mix Signal = 0.5000    FIB Probe = 30kV:500 pA  
 FIB Mag = 704 X    Image Pixel Size = 14.70 nm    Tilt Angle = 0.0°    Scan Rotation = 0.0°    Aperture No. = 1    FIB Imaging = SEM

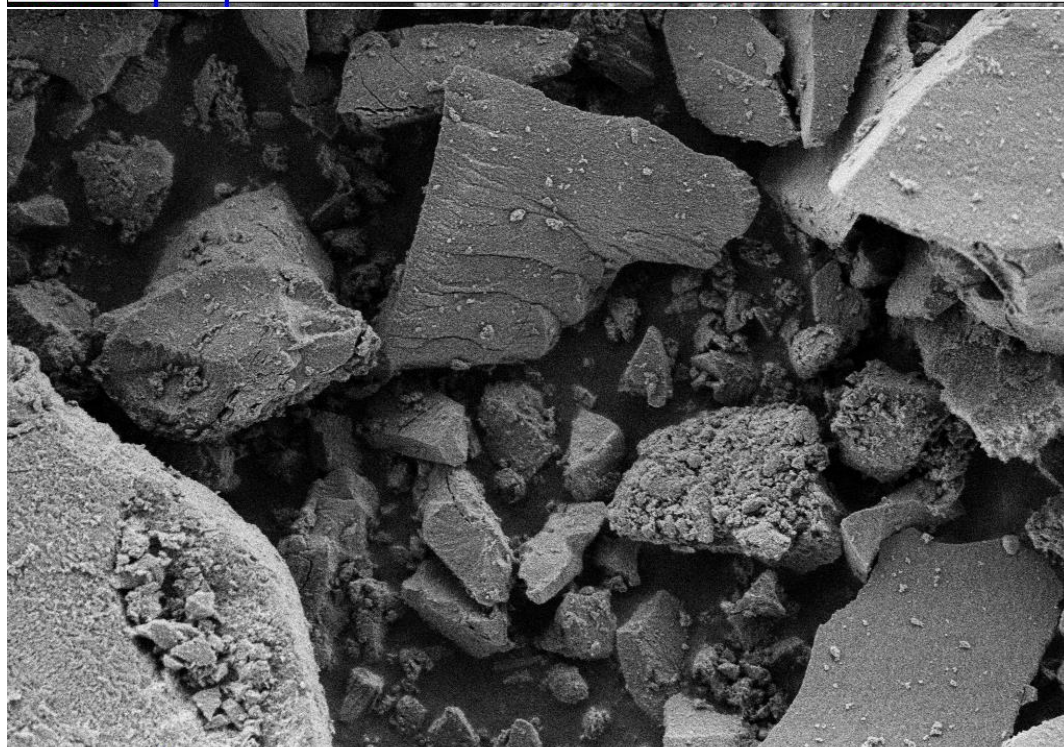

Mag = 5.00 K X    2  $\mu$ m    EHT = 2.00 kV    Stage at Z = 38.426 mm    Stage at T = 0.0°    Signal A = SE2    Mixing = Off    FIB Blanked = Yes  
 FIB Lock Mags = No    WD = 4.1 mm    Stage at M = 4.693 mm    Tilt Corr. = Off    Signal B = SE2    Mix Signal = 0.5000    FIB Probe = 30kV:500 pA  
 FIB Mag = 704 X    Image Pixel Size = 58.79 nm    Tilt Angle = 0.0°    Scan Rotation = 0.0°    Aperture No. = 1    FIB Imaging = SEM



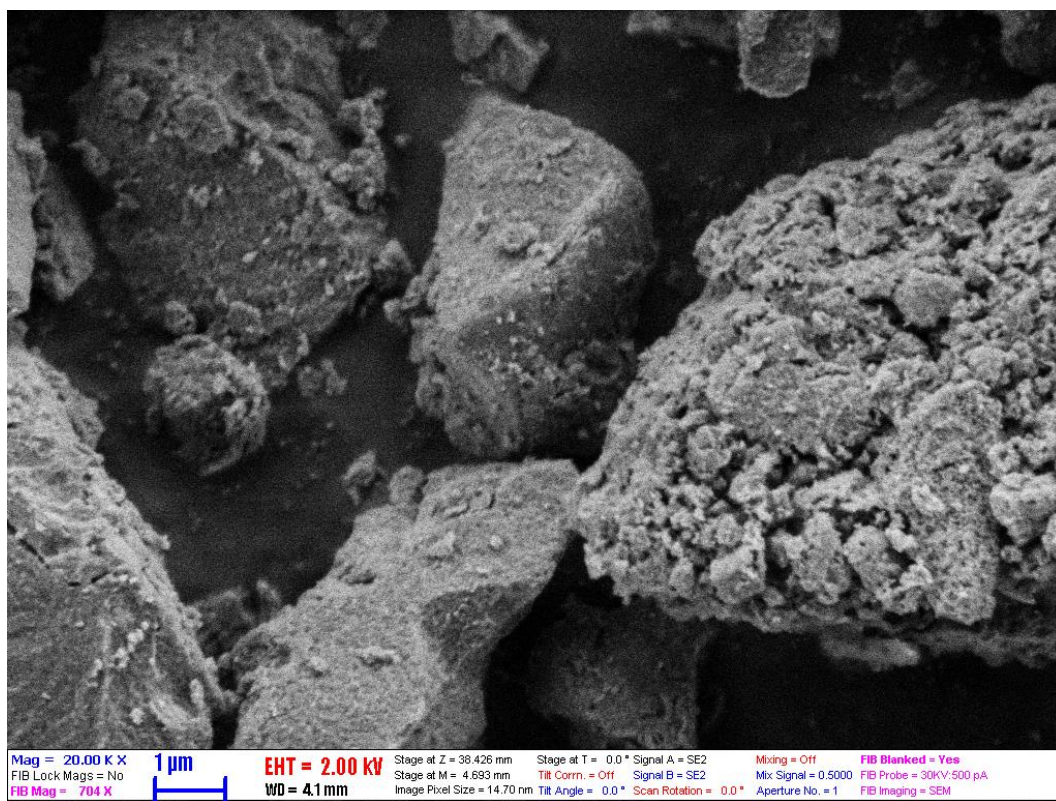

Figure S3 IM-BF4-0.3



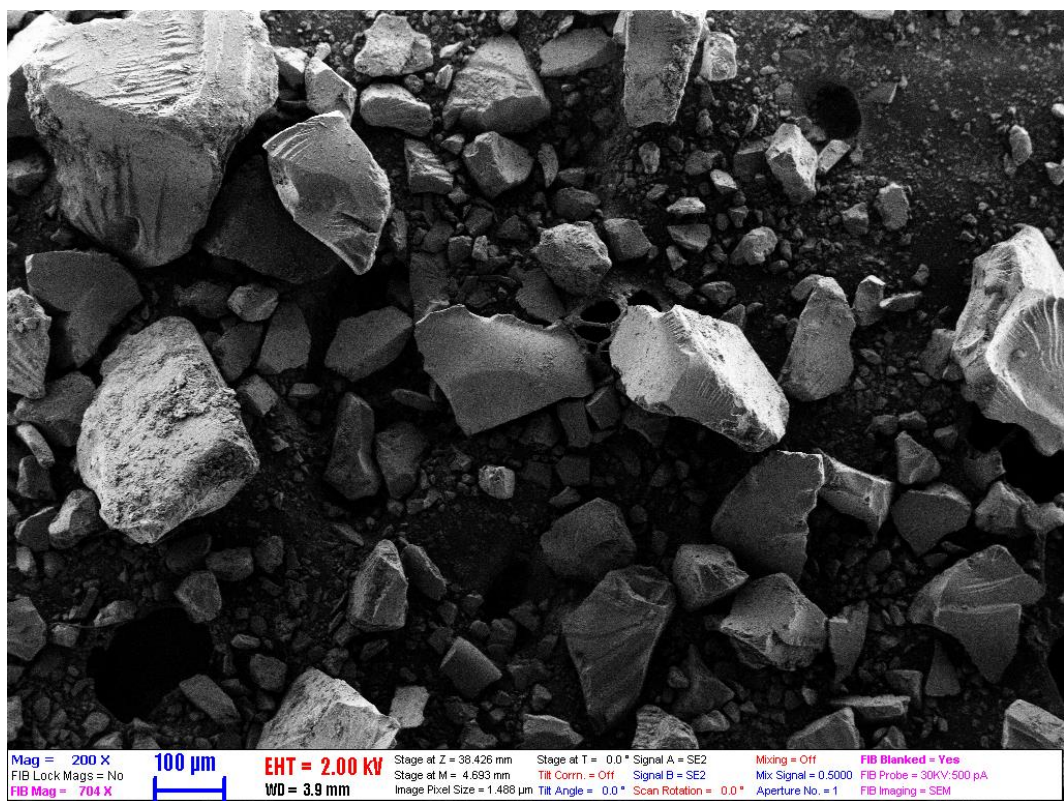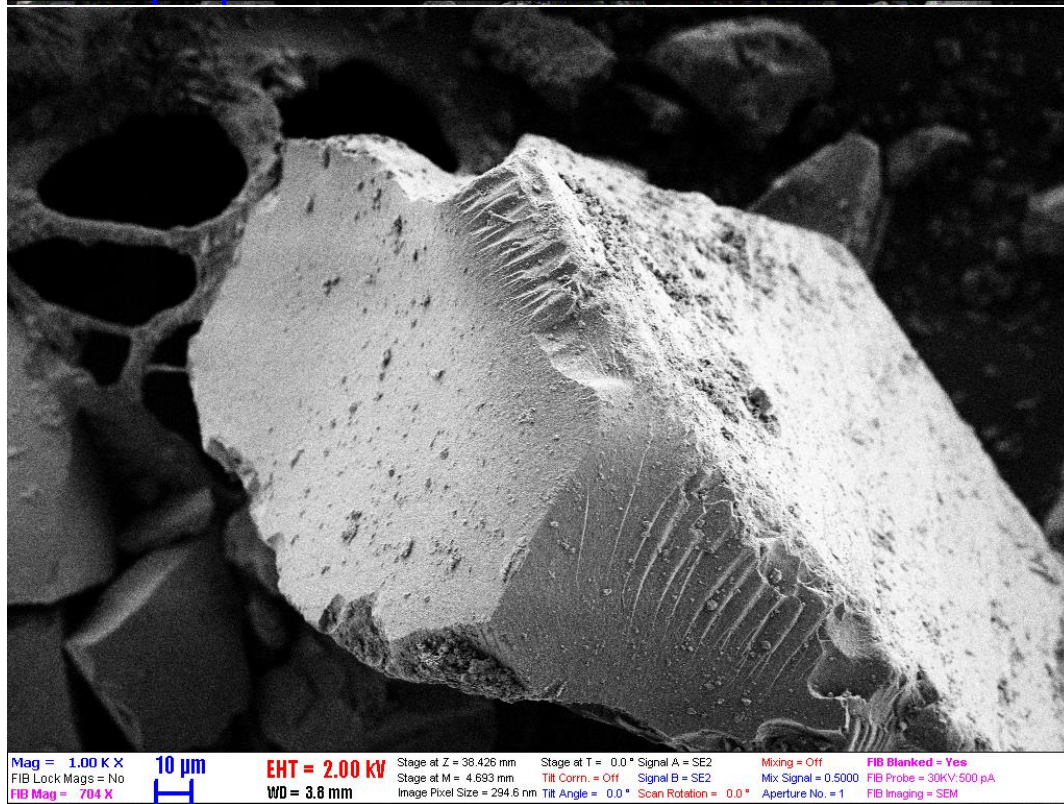



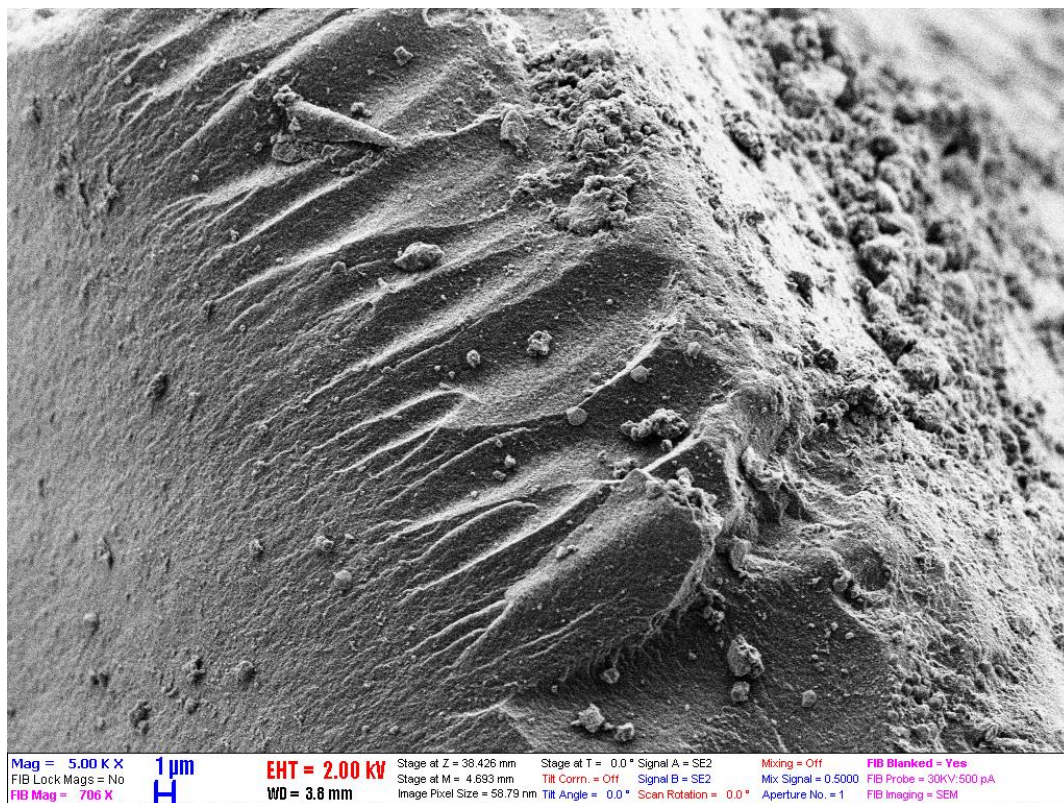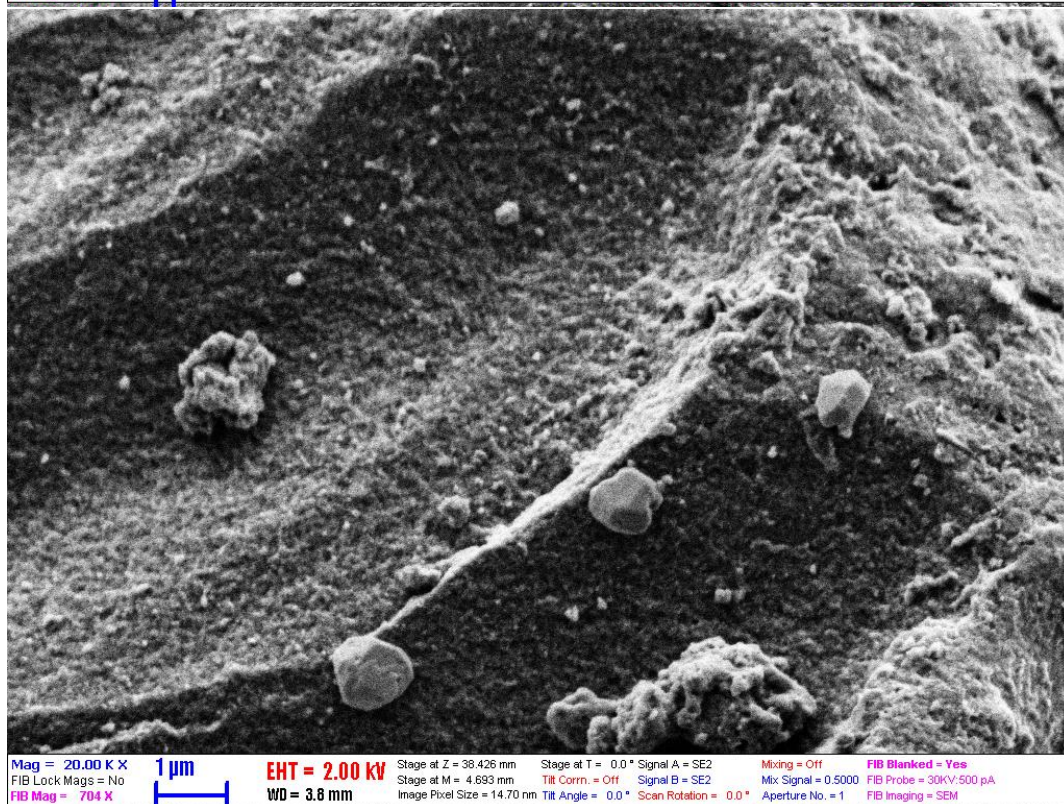



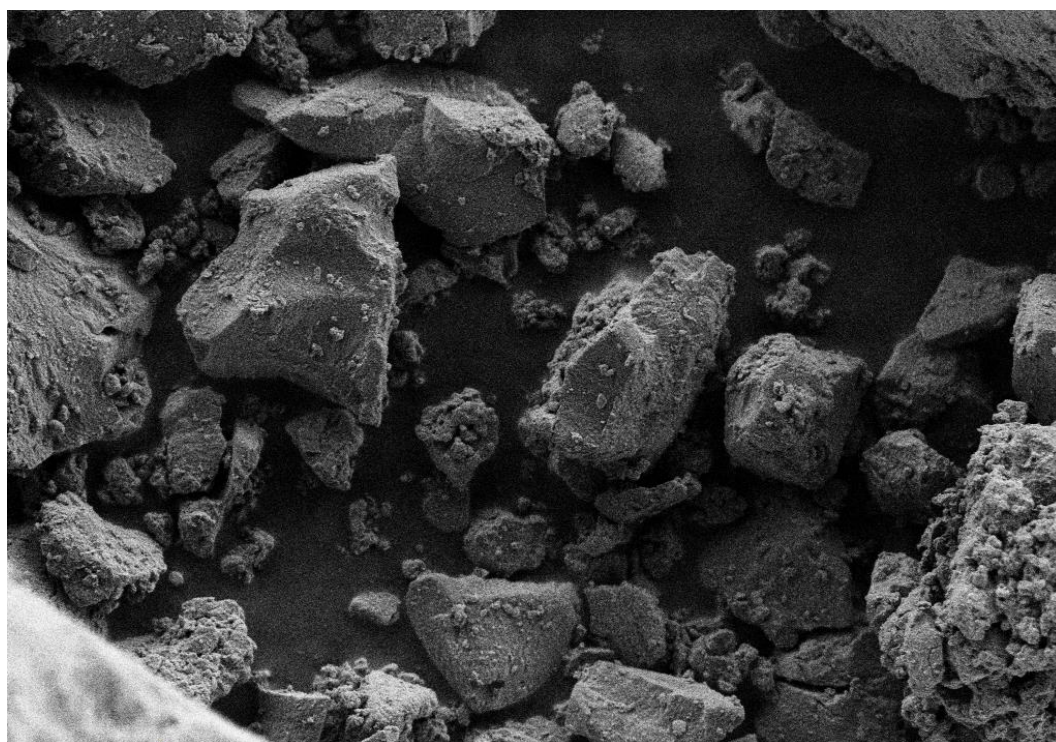

Mag = 5.00 K X    1  $\mu$ m  
 FIB Lock Mags = No  
 FIB Mag = 704 X  
 EHT = 2.00 kV  
 WD = 4.0 mm  
 Stage at Z = 38.426 mm  
 Stage at M = 4.693 mm  
 Image Pixel Size = 58.79 nm  
 Stage at T = 0.0 °  
 Signal A = SE2  
 Tilt Corr. = Off  
 Signal B = SE2  
 Tilt Angle = 0.0 °  
 Scan Rotation = 0.0 °  
 Mixing = Off  
 Mix Signal = 0.5000  
 Aperture No. = 1  
 FIB Blanked = Yes  
 FIB Probe = 30KV-500 pA  
 FIB Imaging = SEM

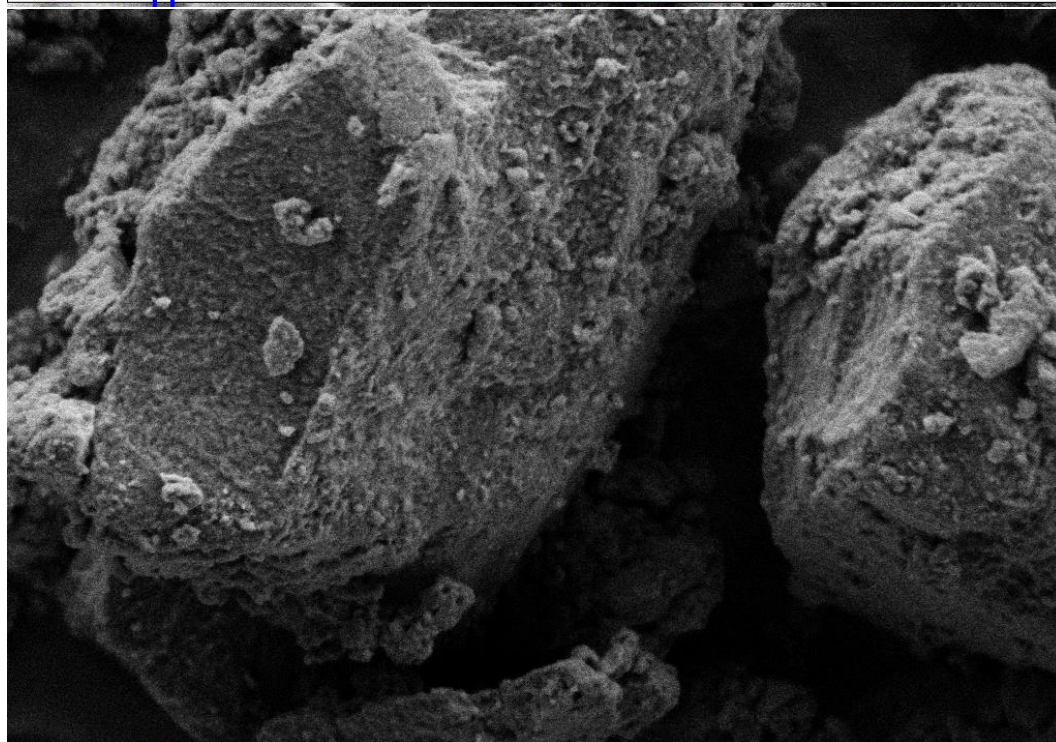

Mag = 20.00 K X    1  $\mu$ m  
 FIB Lock Mags = No  
 FIB Mag = 704 X  
 EHT = 2.00 kV  
 WD = 4.0 mm  
 Stage at Z = 38.426 mm  
 Stage at M = 4.693 mm  
 Image Pixel Size = 14.70 nm  
 Stage at T = 0.0 °  
 Signal A = SE2  
 Tilt Corr. = Off  
 Signal B = SE2  
 Tilt Angle = 0.0 °  
 Scan Rotation = 0.0 °  
 Mixing = Off  
 Mix Signal = 0.5000  
 Aperture No. = 1  
 FIB Blanked = Yes  
 FIB Probe = 30KV-500 pA  
 FIB Imaging = SEM



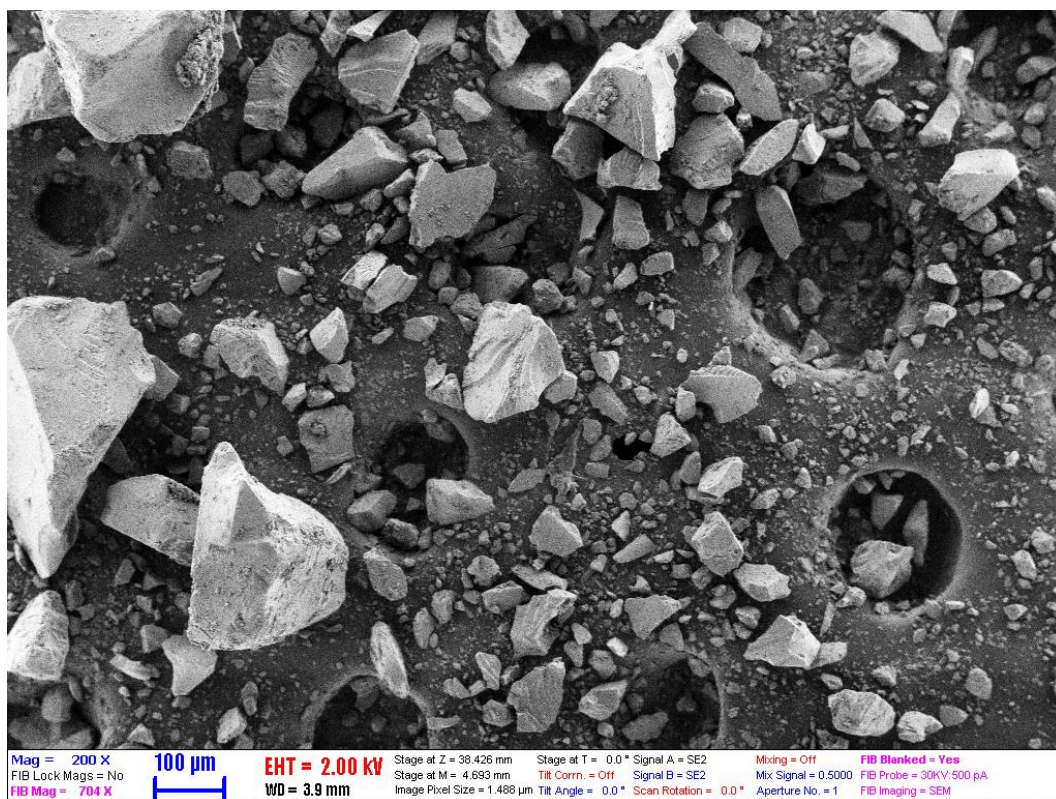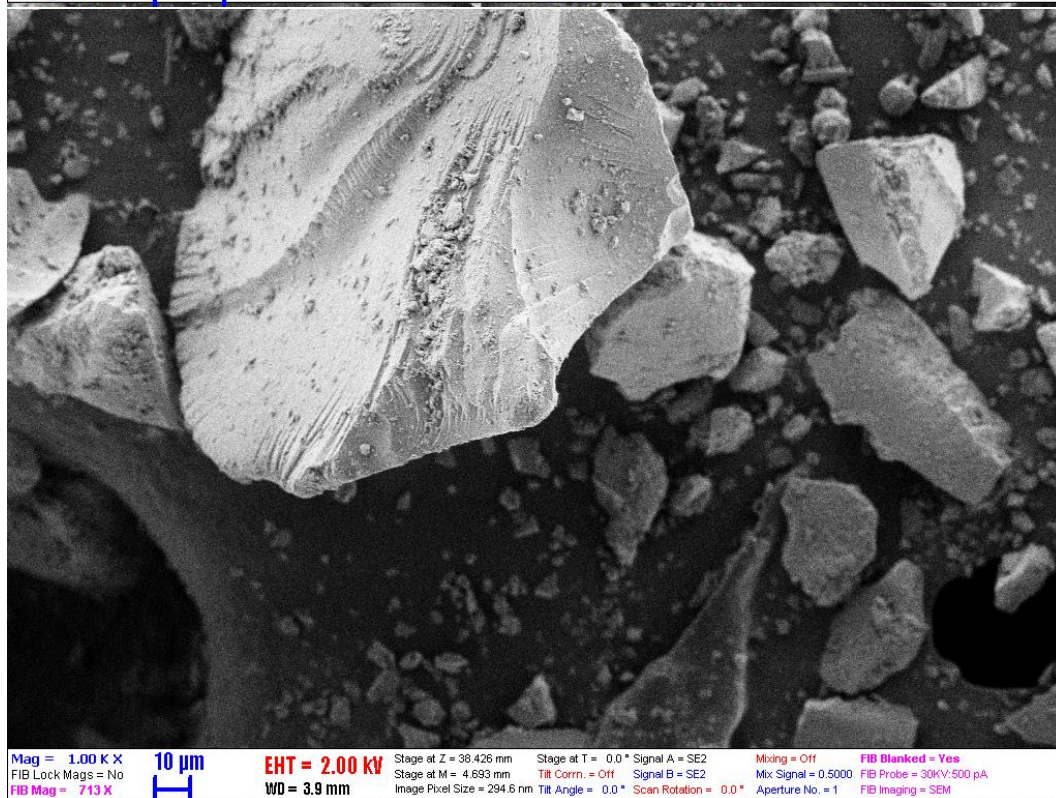



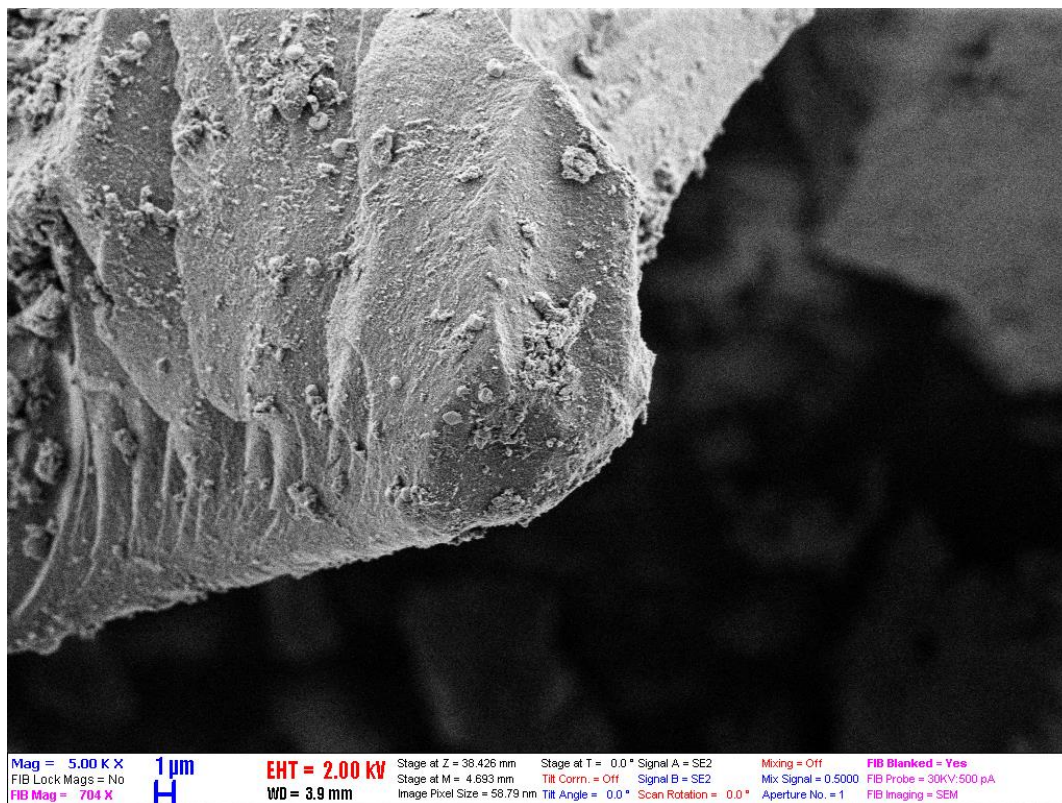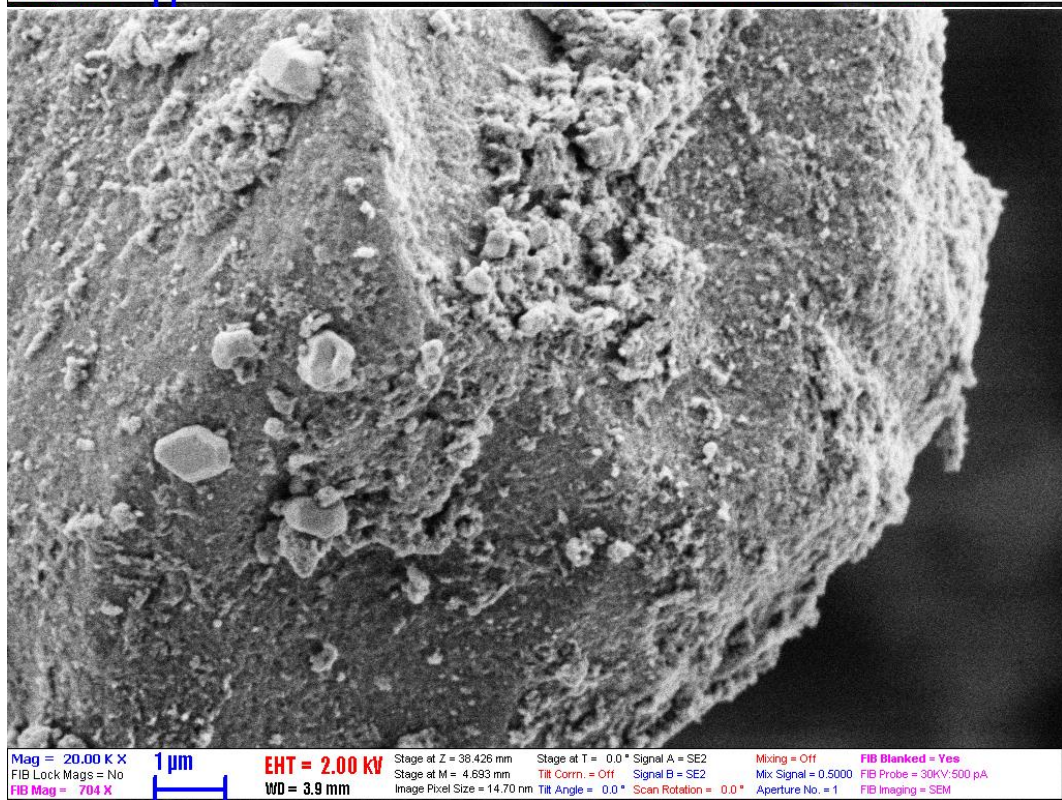



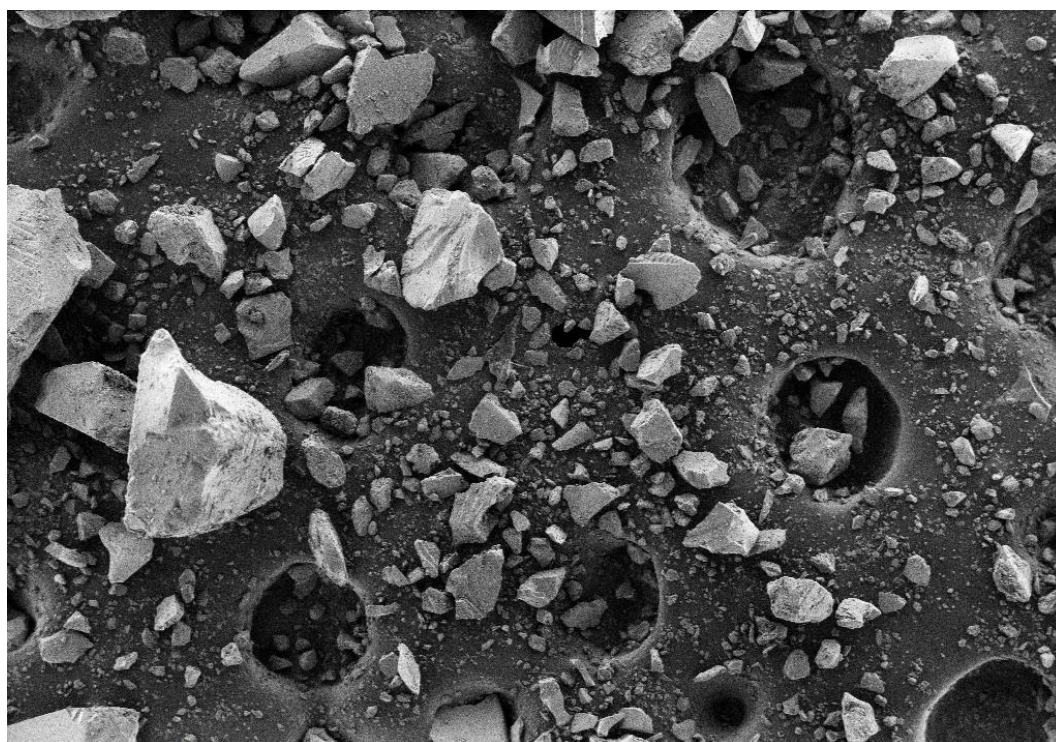

Mag = 200 X  
 FIB Lock Mags = No  
 FIB Mag = 704 X  
 EHT = 2.00 kV  
 WD = 4.0 mm  
 Stage at Z = 38.426 mm  
 Stage at M = 4.693 mm  
 Image Pixel Size = 1.488 μm  
 Stage at T = 0.0 °  
 Signal A = SE2  
 Tilt Corr. = Off  
 Signal B = SE2  
 Tilt Angle = 0.0 °  
 Scan Rotation = 0.0 °  
 Mixing = Off  
 Mix Signal = 0.5000  
 Aperture No. = 1  
 FIB Blanked = Yes  
 FIB Probe = 30KV-500 pA  
 FIB Imaging = SEM

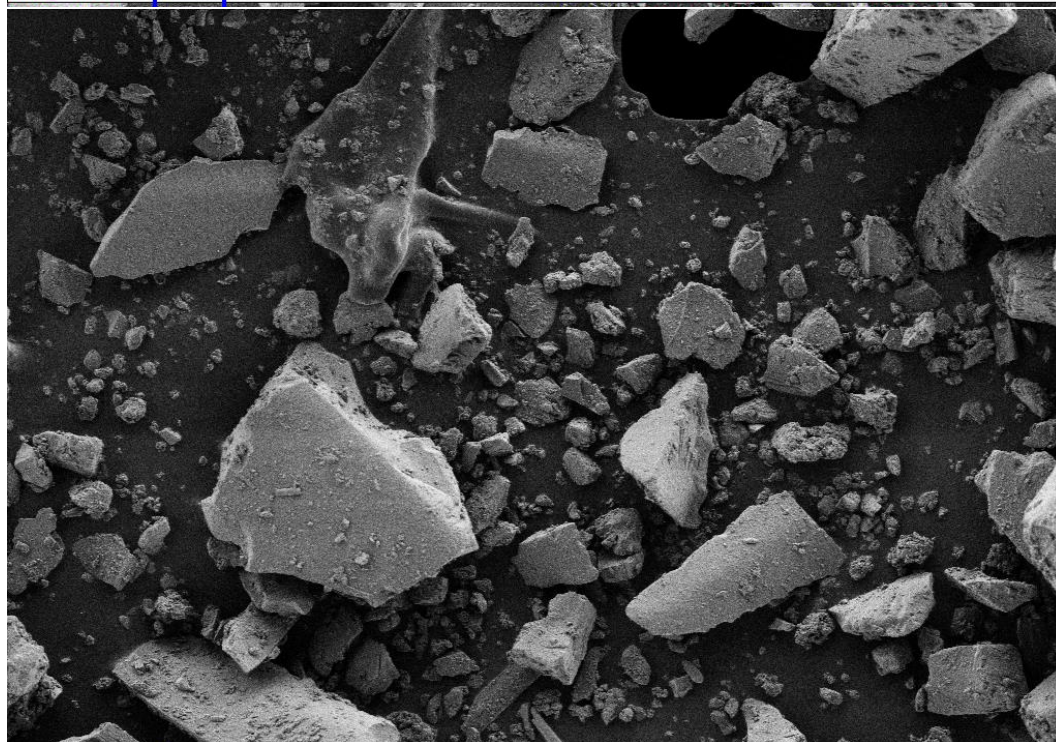

Mag = 1.00 K X  
 FIB Lock Mags = No  
 FIB Mag = 704 X  
 EHT = 2.00 kV  
 WD = 4.0 mm  
 Stage at Z = 38.426 mm  
 Stage at M = 4.693 mm  
 Image Pixel Size = 294.6 nm  
 Stage at T = 0.0 °  
 Signal A = SE2  
 Tilt Corr. = Off  
 Signal B = SE2  
 Tilt Angle = 0.0 °  
 Scan Rotation = 0.0 °  
 Mixing = Off  
 Mix Signal = 0.5000  
 Aperture No. = 1  
 FIB Blanked = Yes  
 FIB Probe = 30KV-500 pA  
 FIB Imaging = SEM



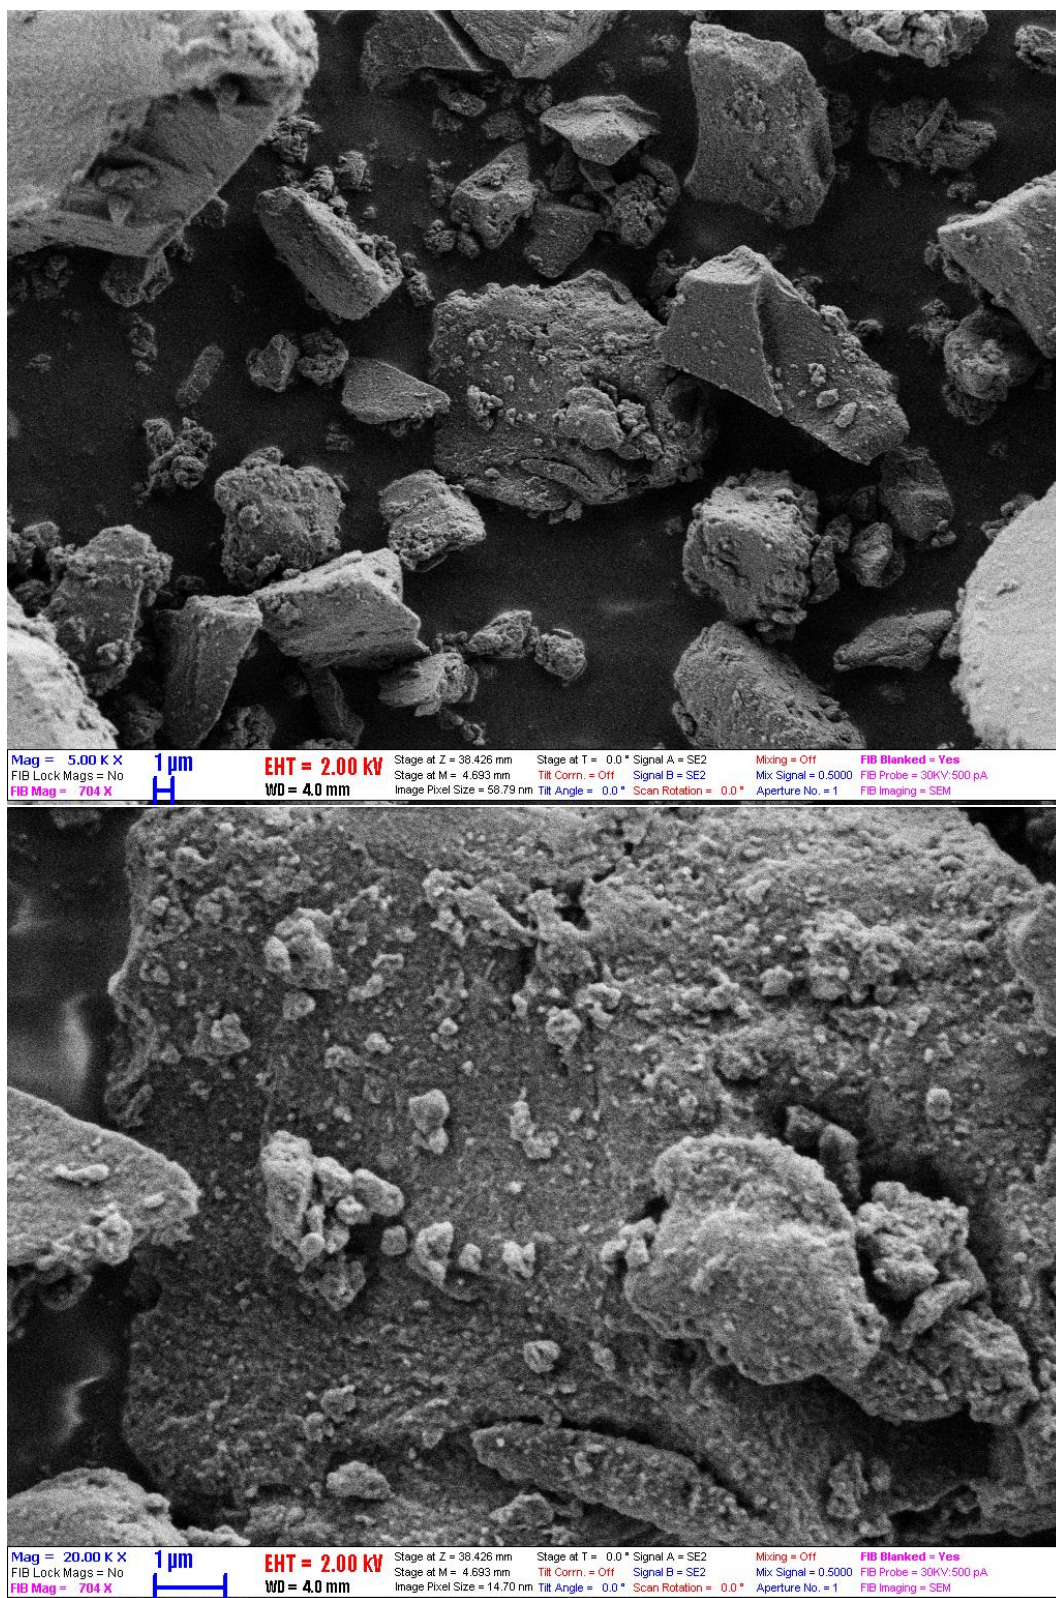

Figure S4 IM-BF4-0.5



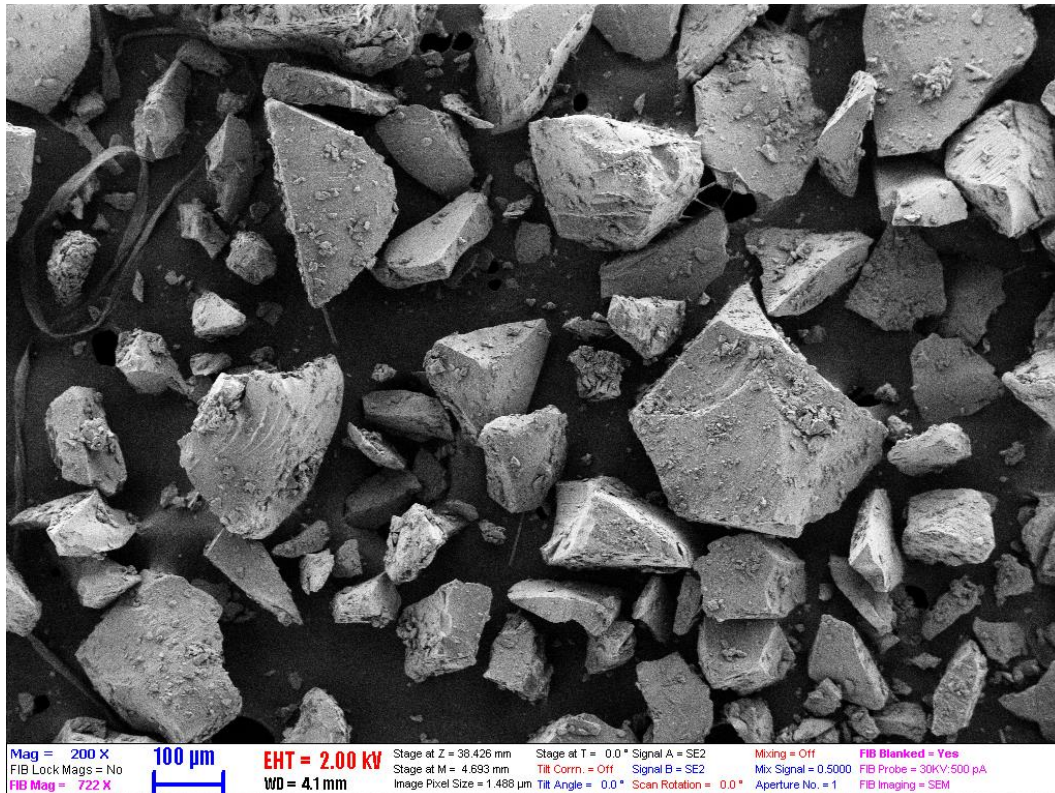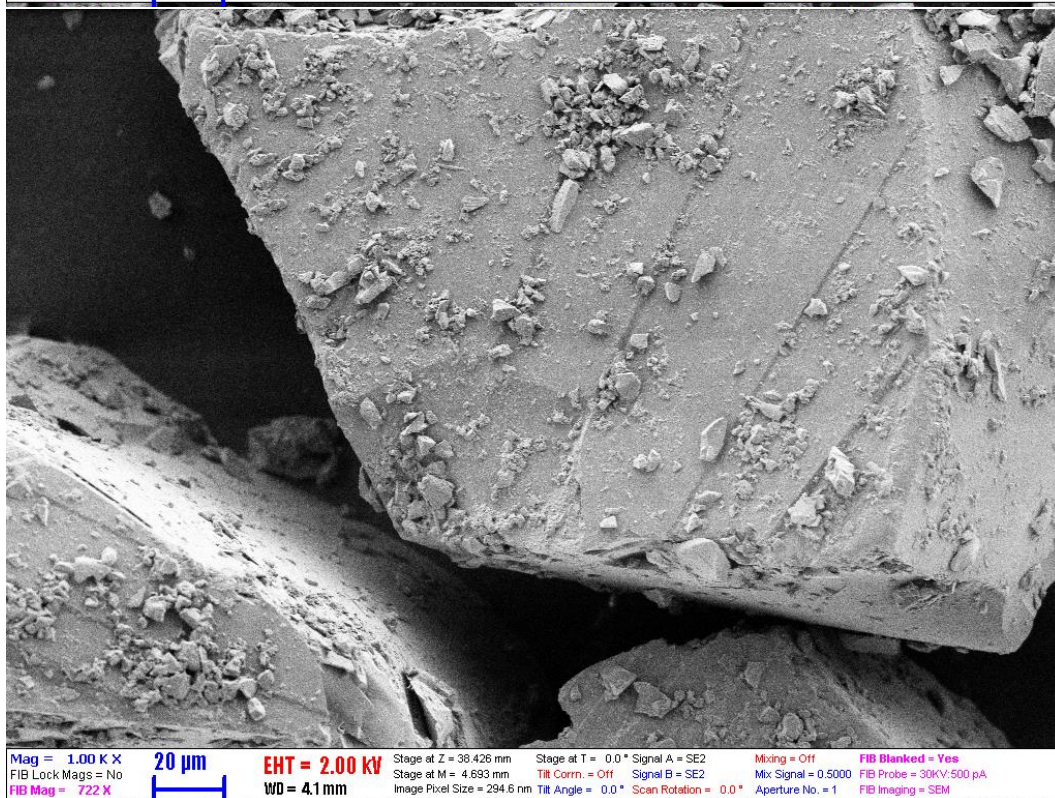



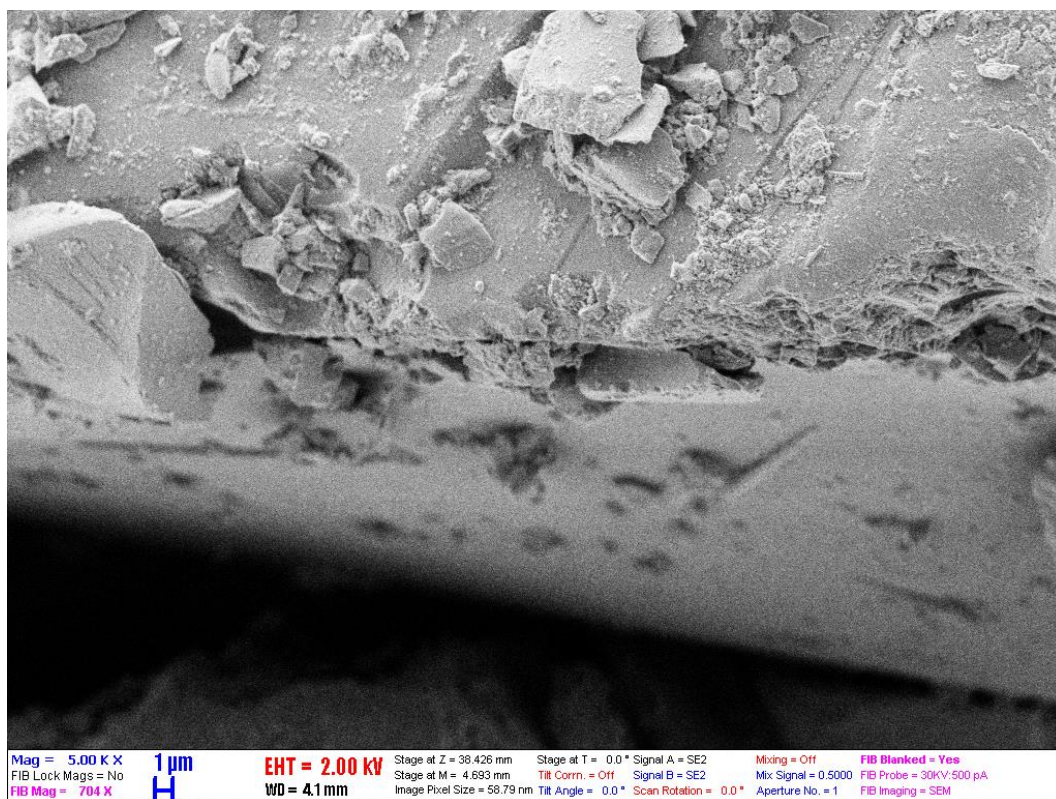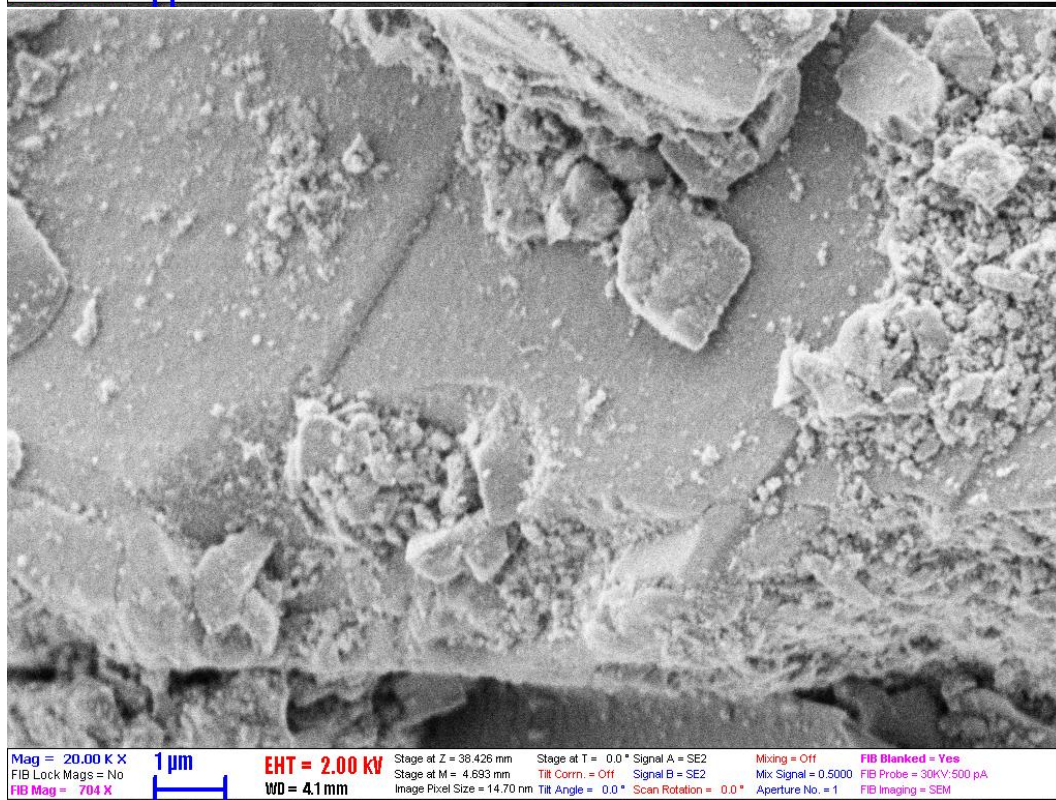



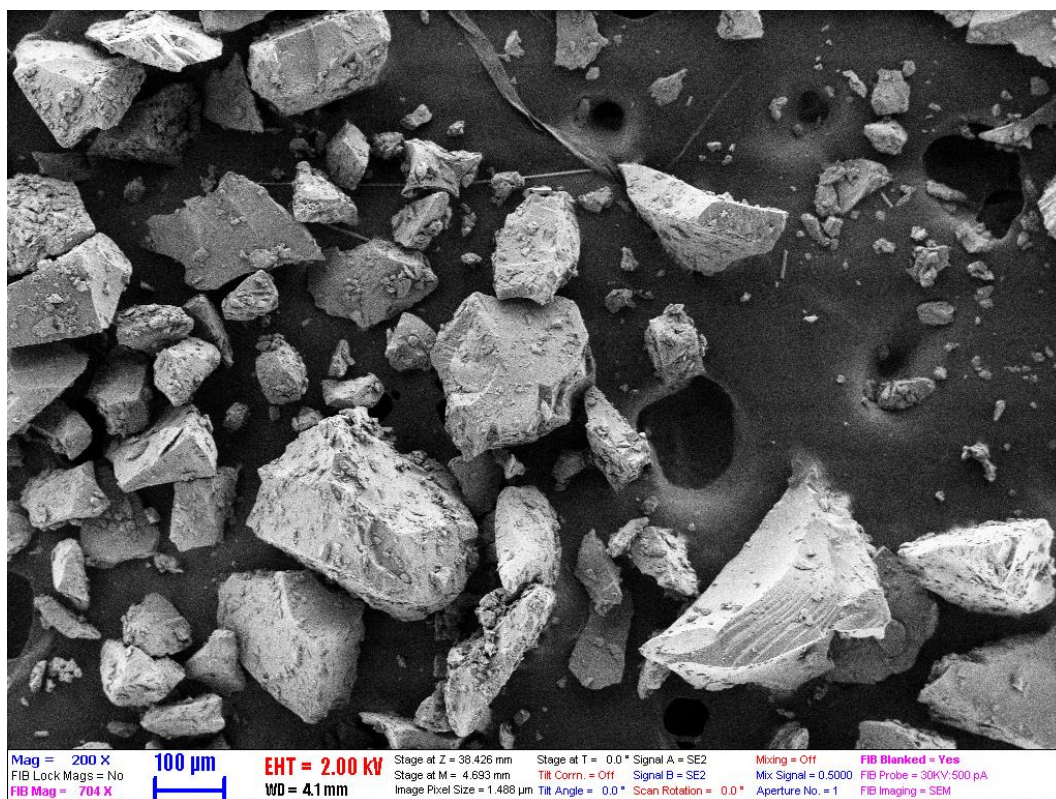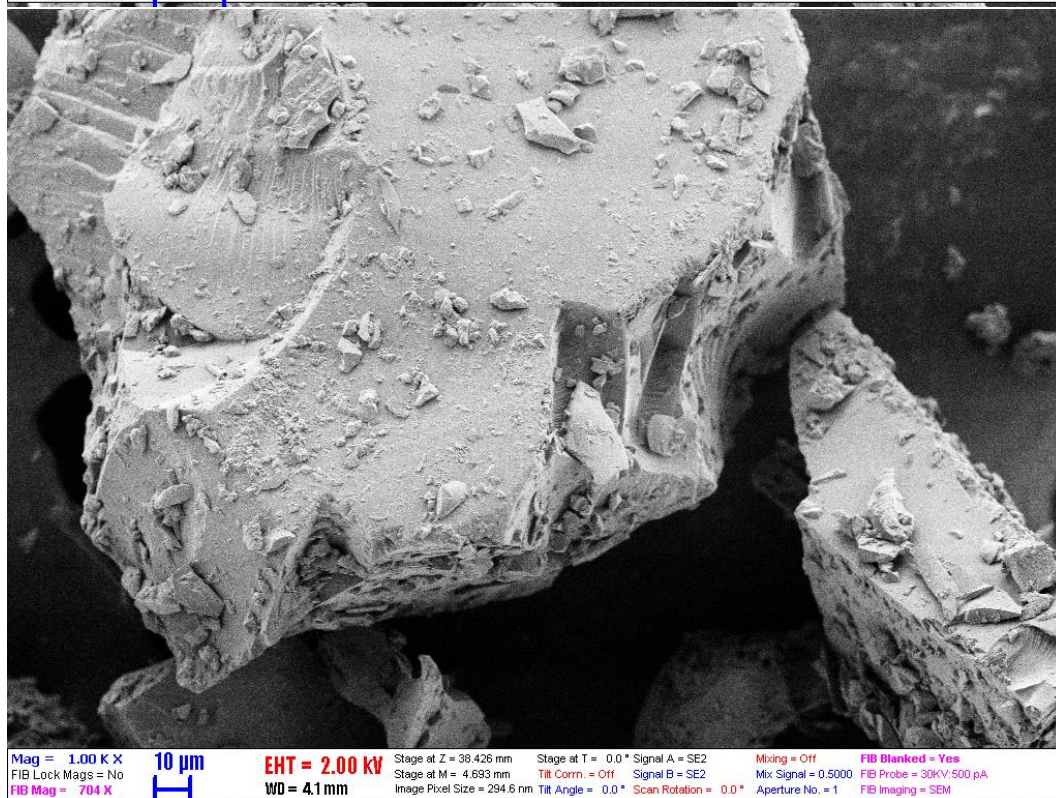



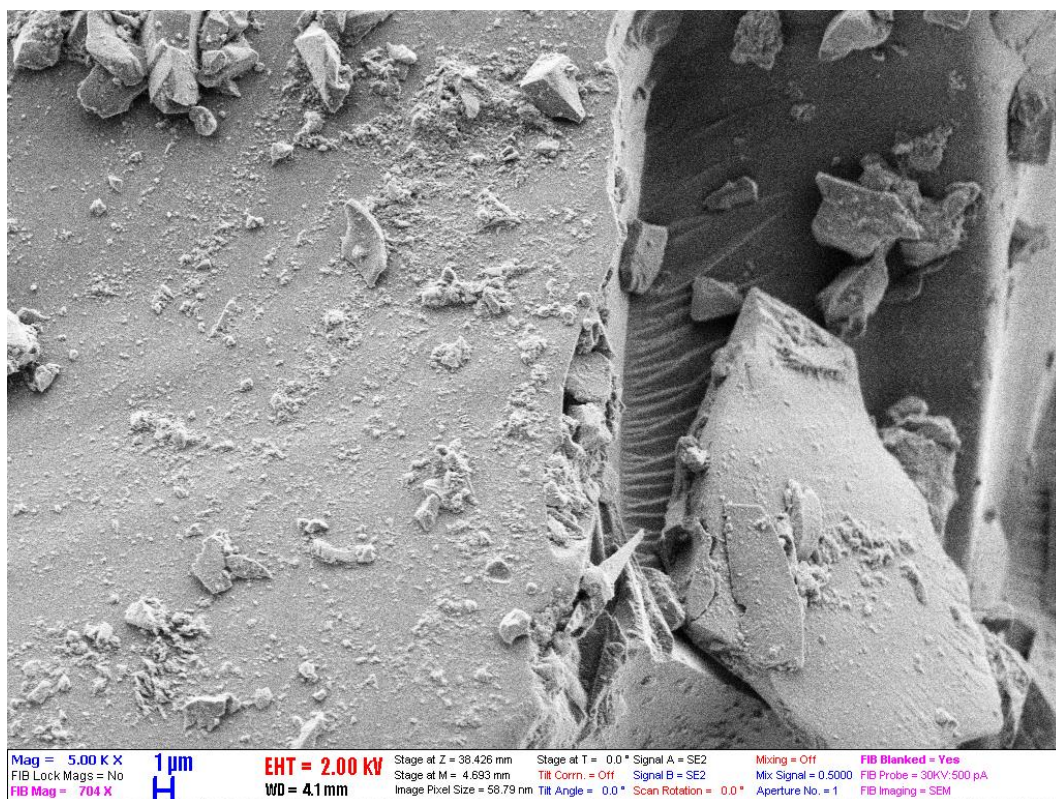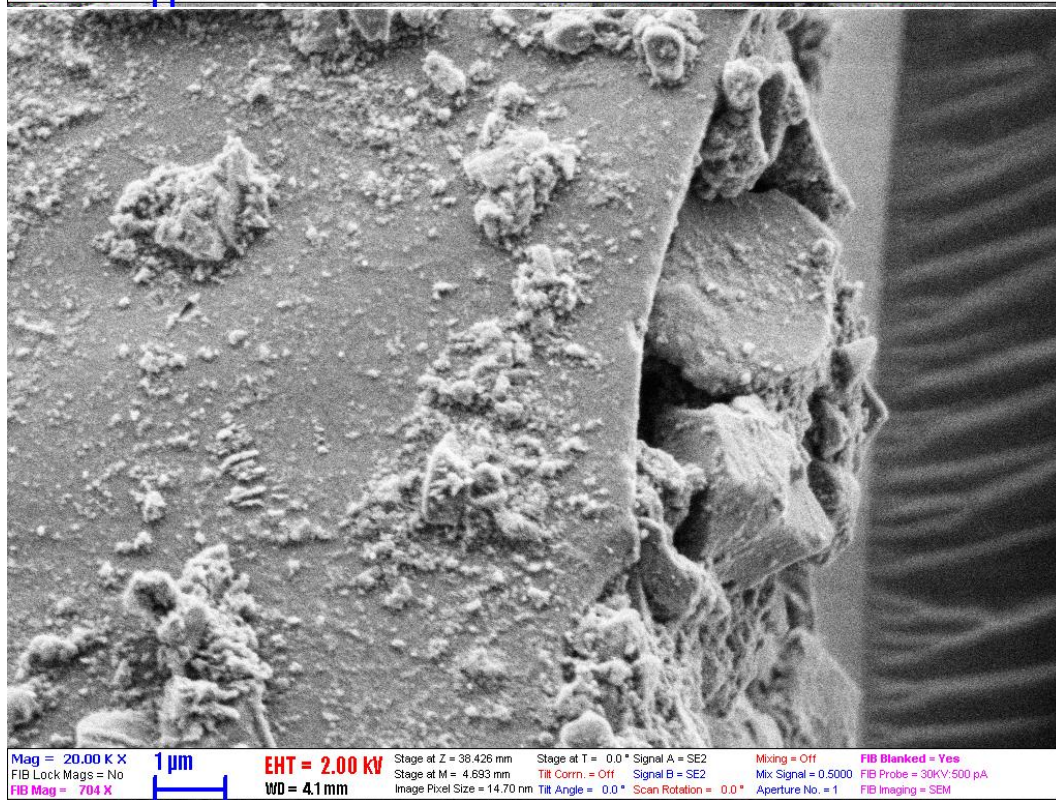



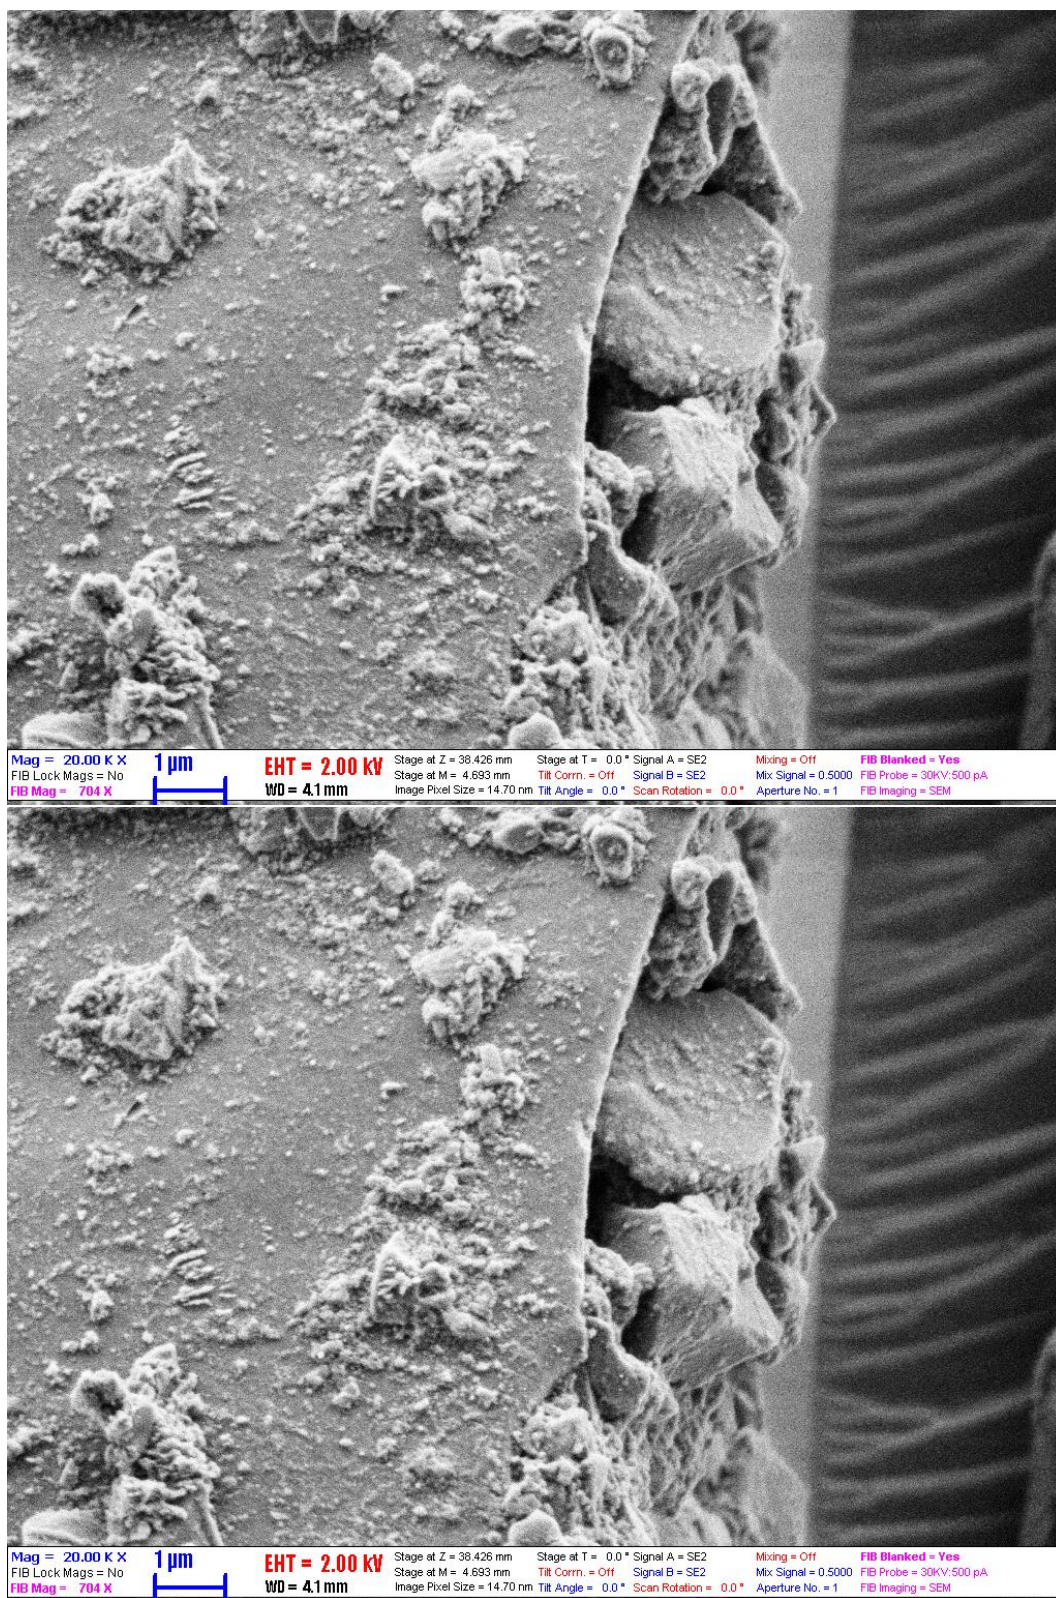

Figure S5 IM-CI-0.1



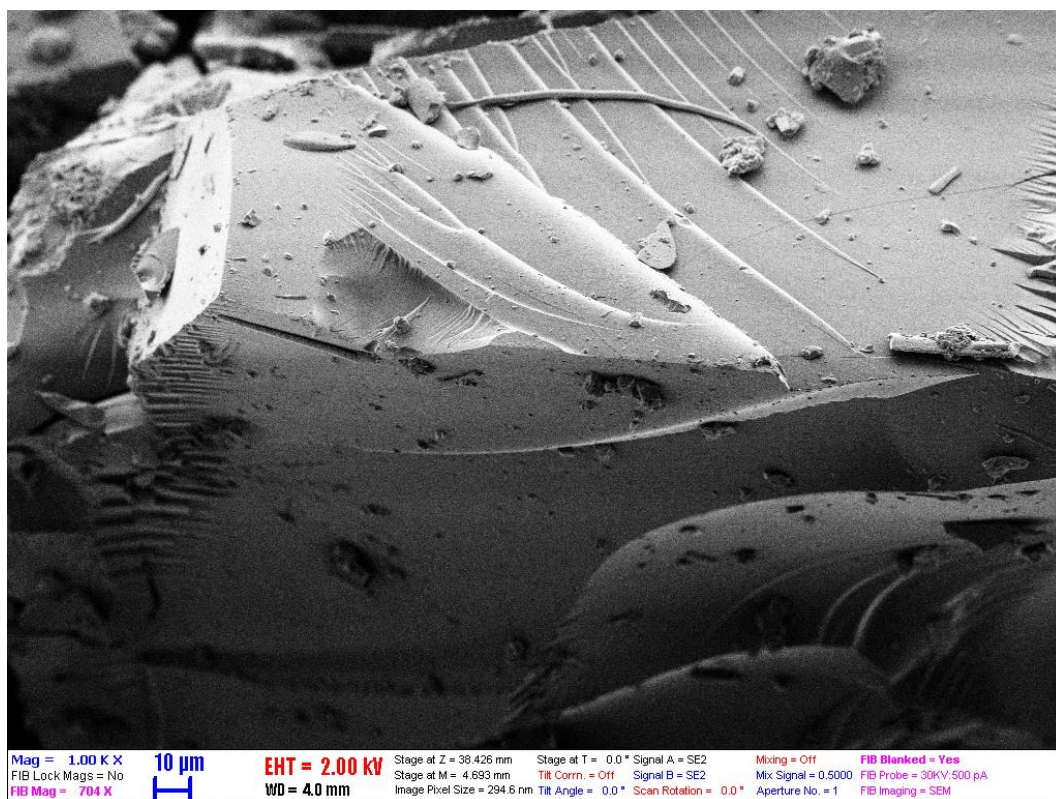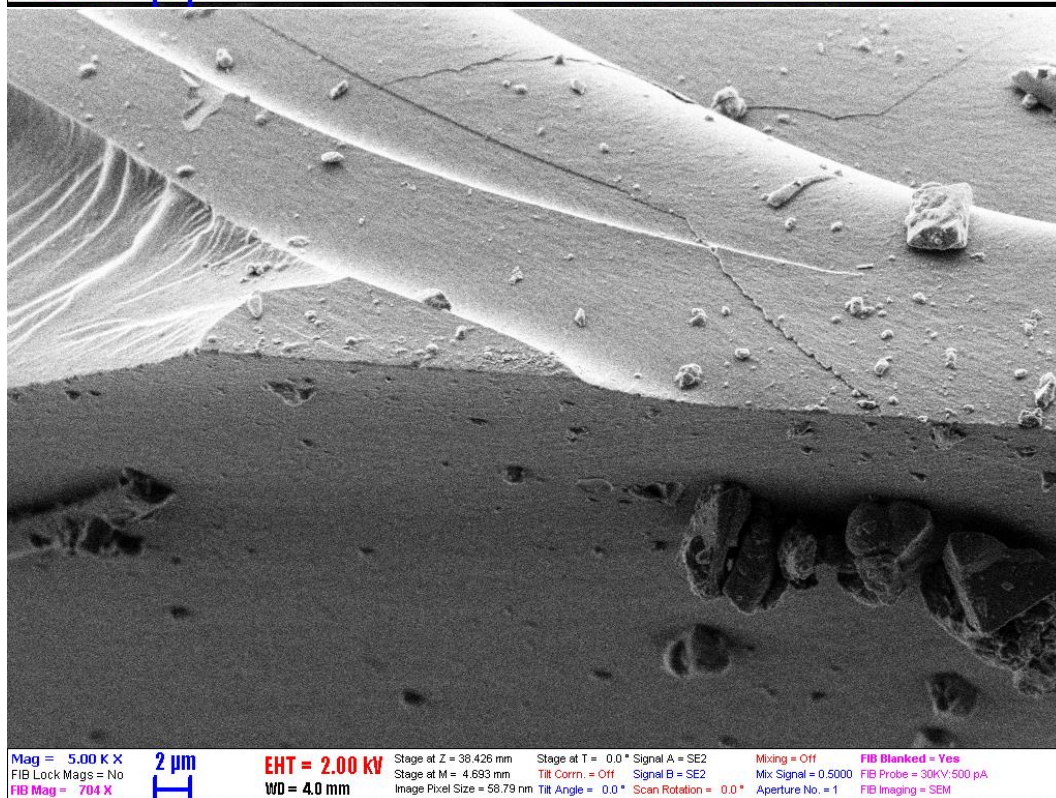



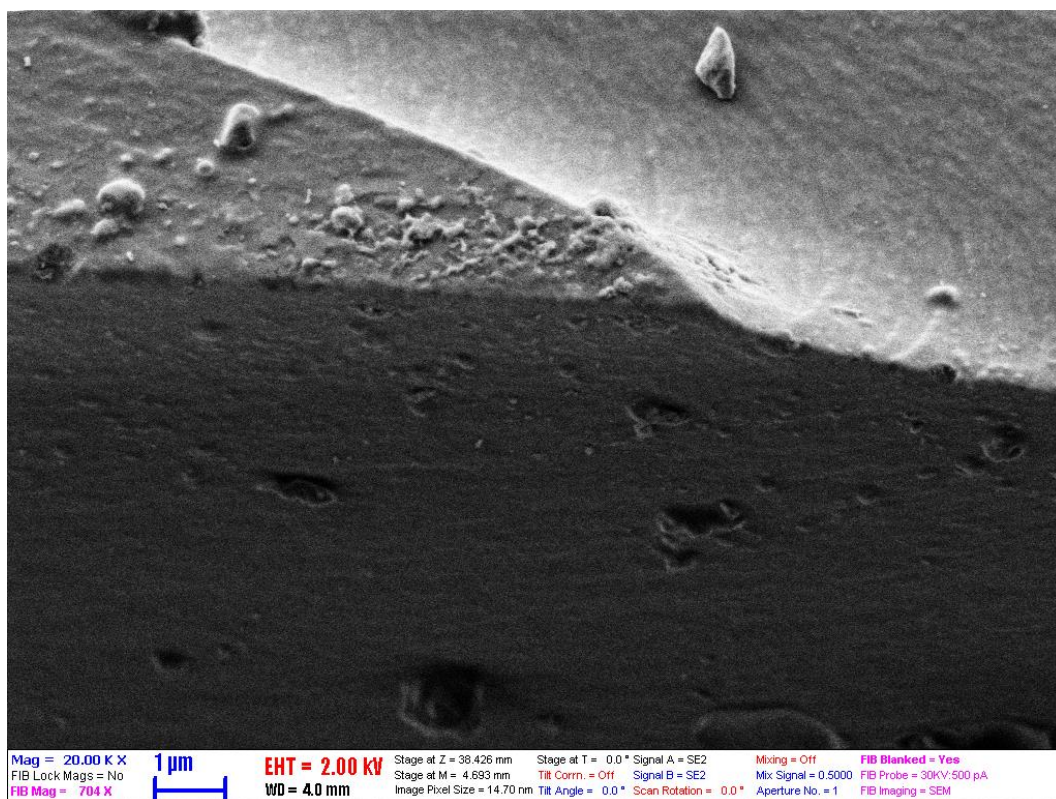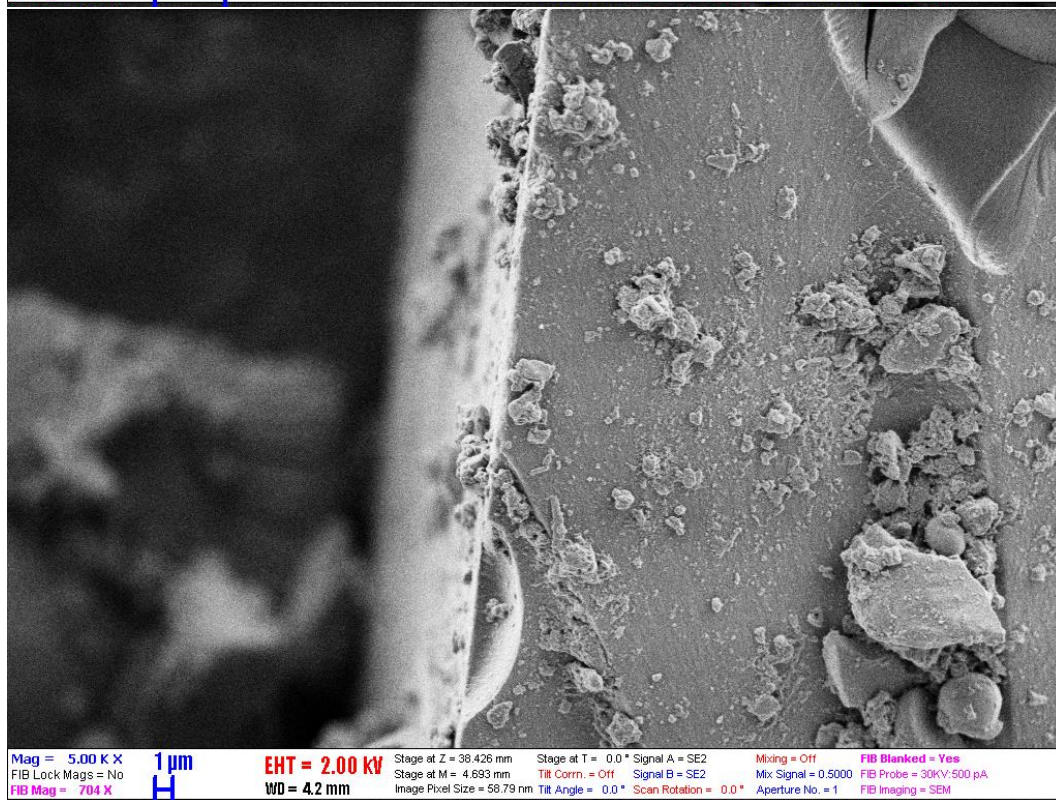



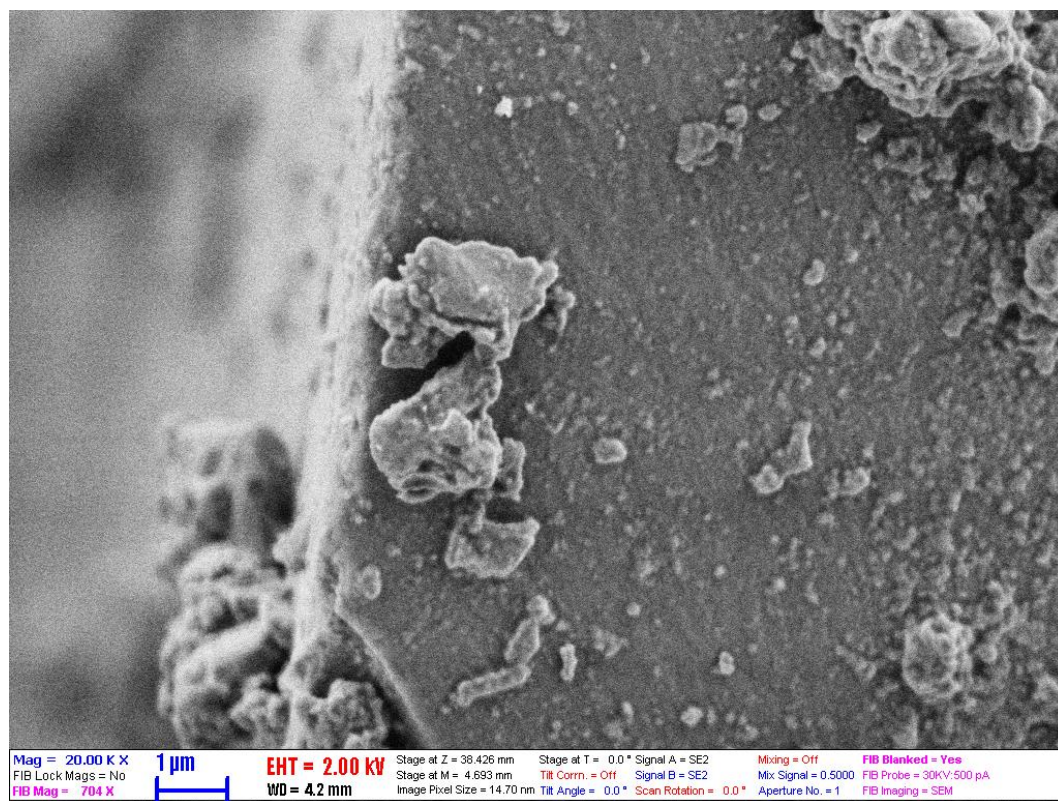

Figure S6 IM-CI-0.3



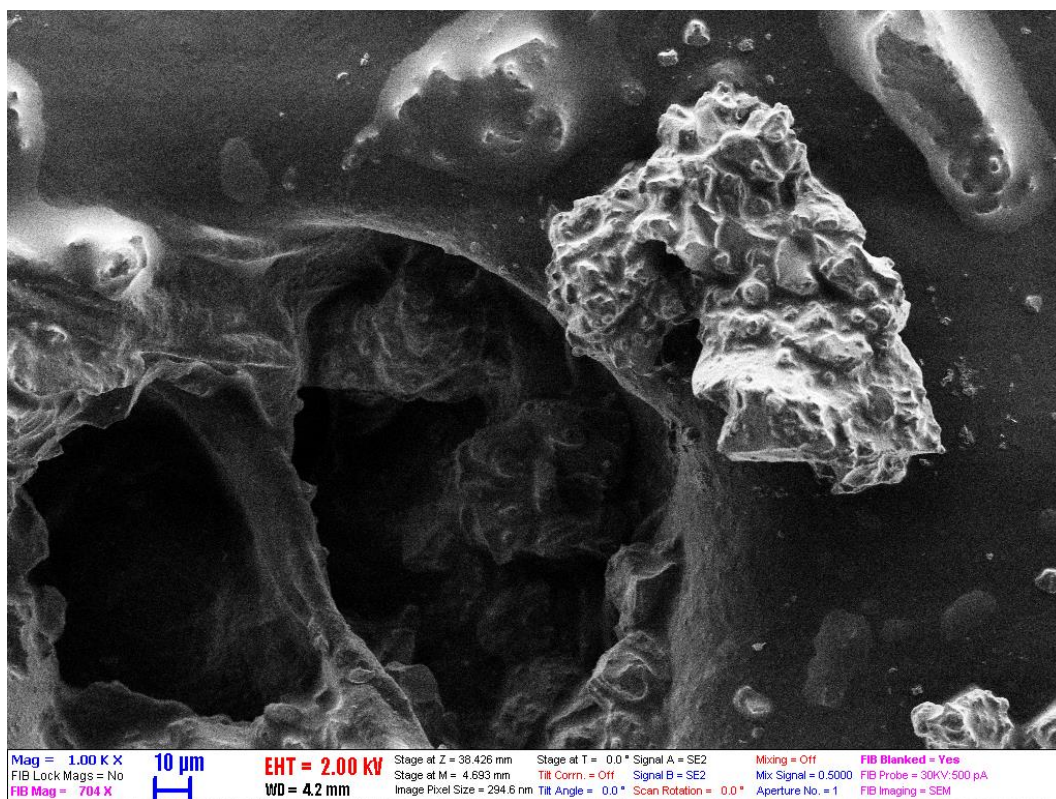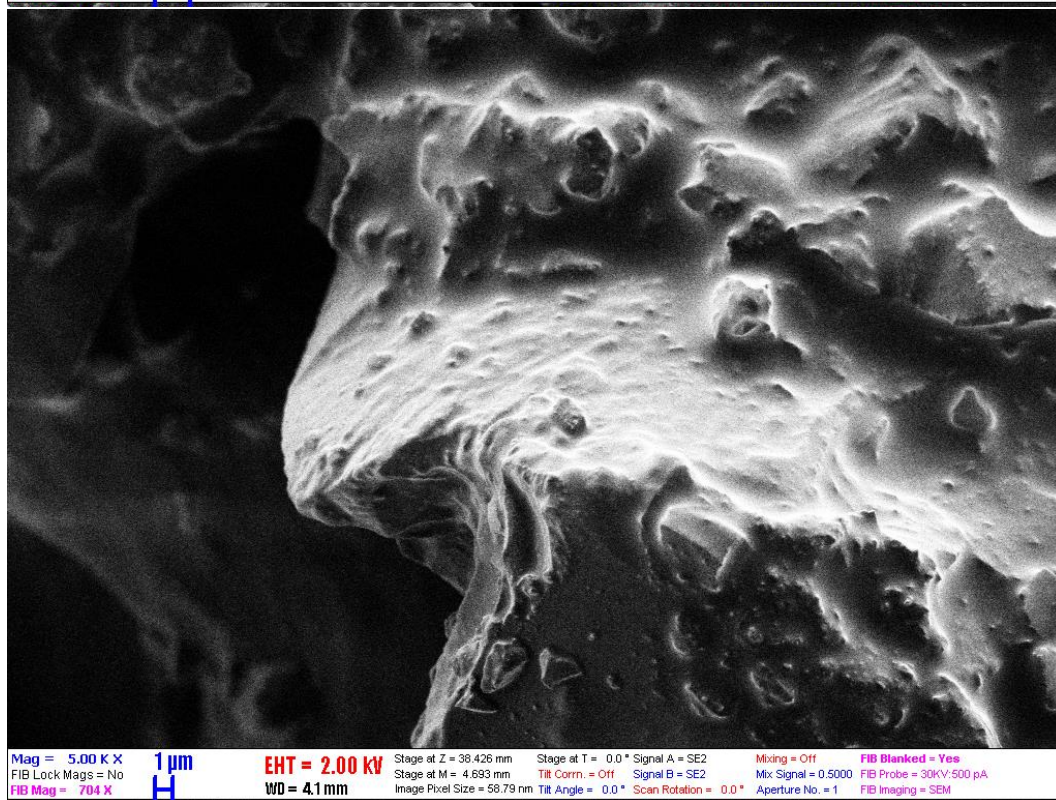



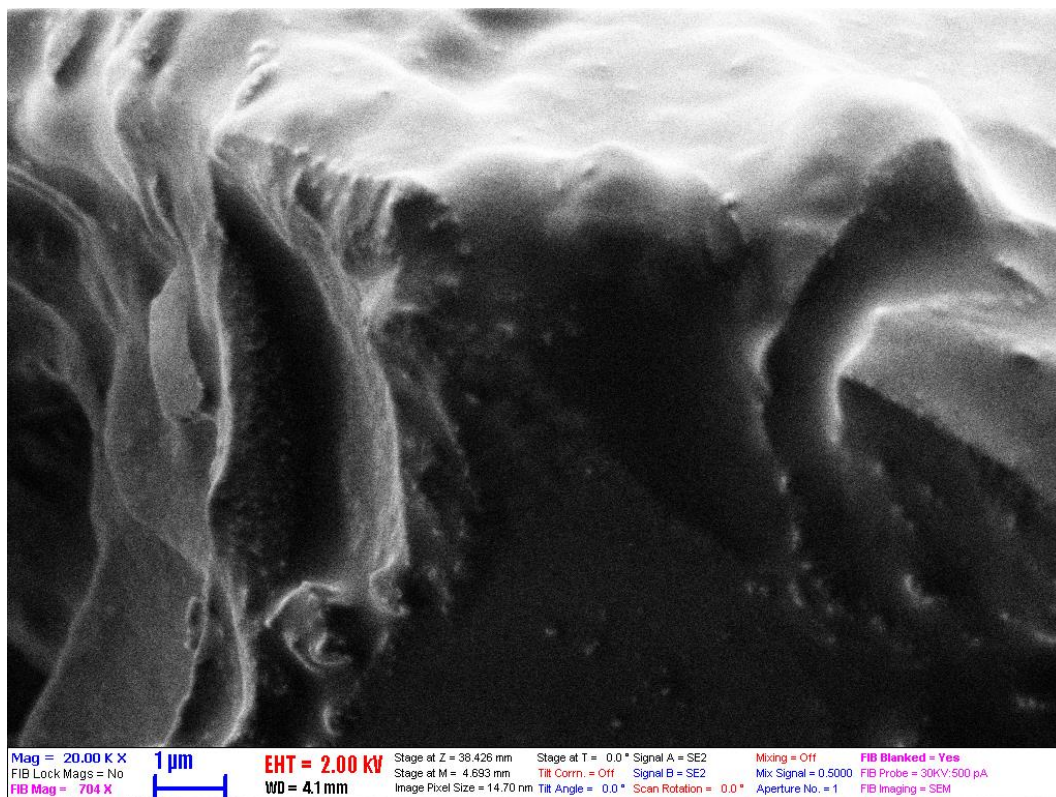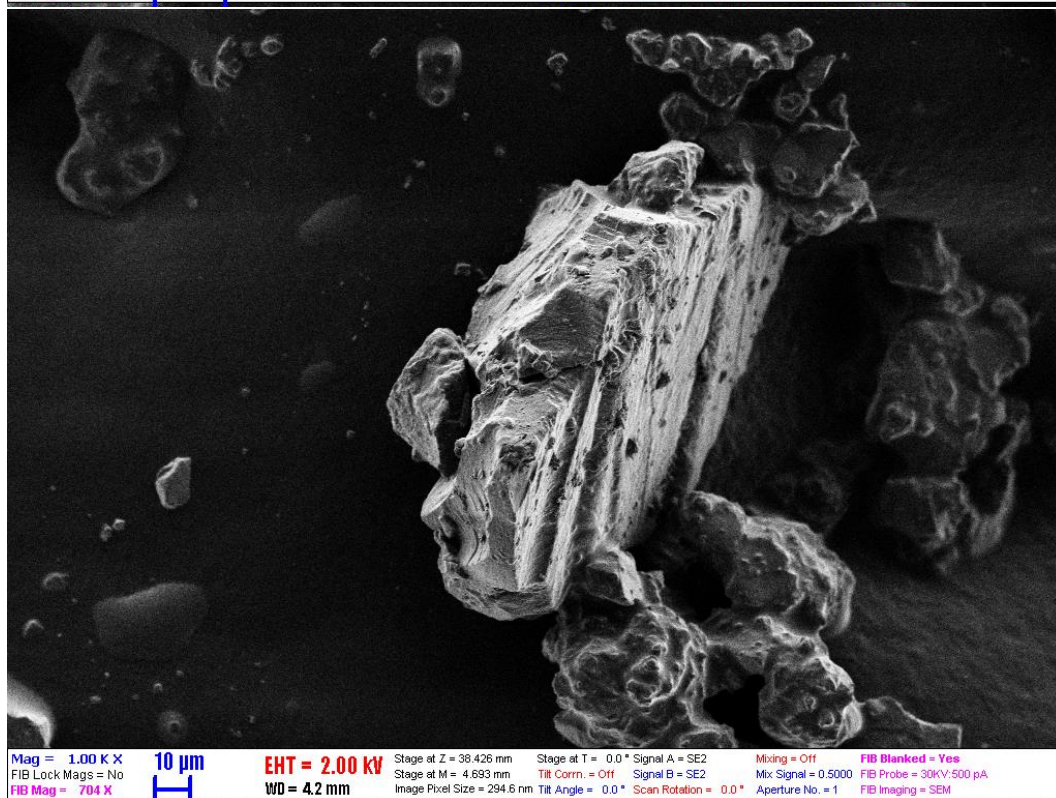



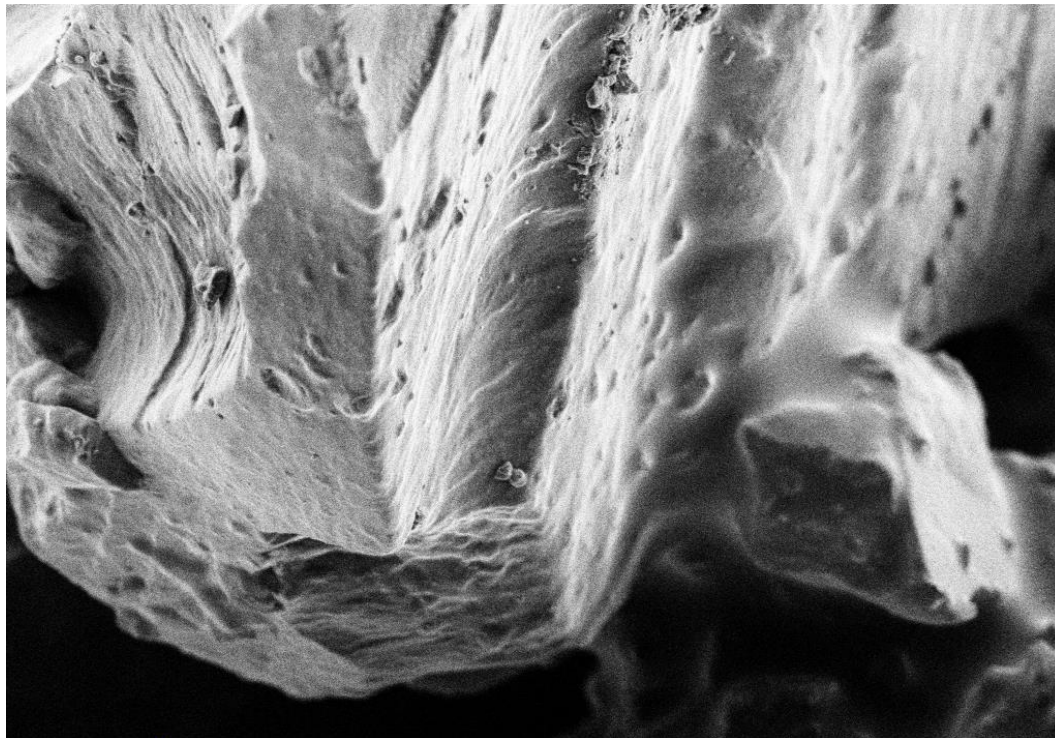

Mag = 5.00 K X    1 µm  
 FIB Lock Mags = No    H  
 FIB Mag = 704 X  
 EHT = 2.00 kV  
 WD = 4.2 mm  
 Stage at Z = 38.426 mm  
 Stage at M = 4.693 mm  
 Image Pixel Size = 58.79 nm  
 Stage at T = 0.0 ° Signal A = SE2  
 Tilt Corr. = Off Signal B = SE2  
 Tilt Angle = 0.0 ° Scan Rotation = 0.0 °  
 Mixing = Off  
 Mix Signal = 0.5000  
 Aperture No. = 1  
 FIB Blanked = Yes  
 FIB Probe = 30KV-500 pA  
 FIB Imaging = SEM

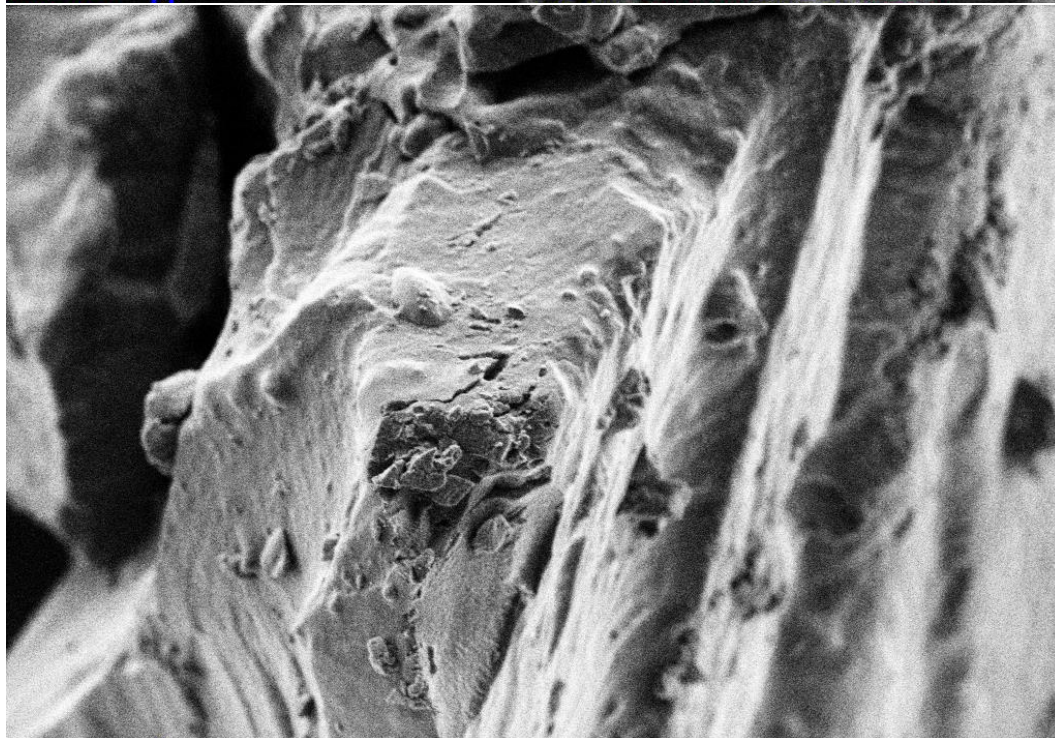

Mag = 5.00 K X    1 µm  
 FIB Lock Mags = No    H  
 FIB Mag = 704 X  
 EHT = 2.00 kV  
 WD = 4.2 mm  
 Stage at Z = 38.426 mm  
 Stage at M = 4.693 mm  
 Image Pixel Size = 58.79 nm  
 Stage at T = 0.0 ° Signal A = SE2  
 Tilt Corr. = Off Signal B = SE2  
 Tilt Angle = 0.0 ° Scan Rotation = 0.0 °  
 Mixing = Off  
 Mix Signal = 0.5000  
 Aperture No. = 1  
 FIB Blanked = Yes  
 FIB Probe = 30KV-500 pA  
 FIB Imaging = SEM



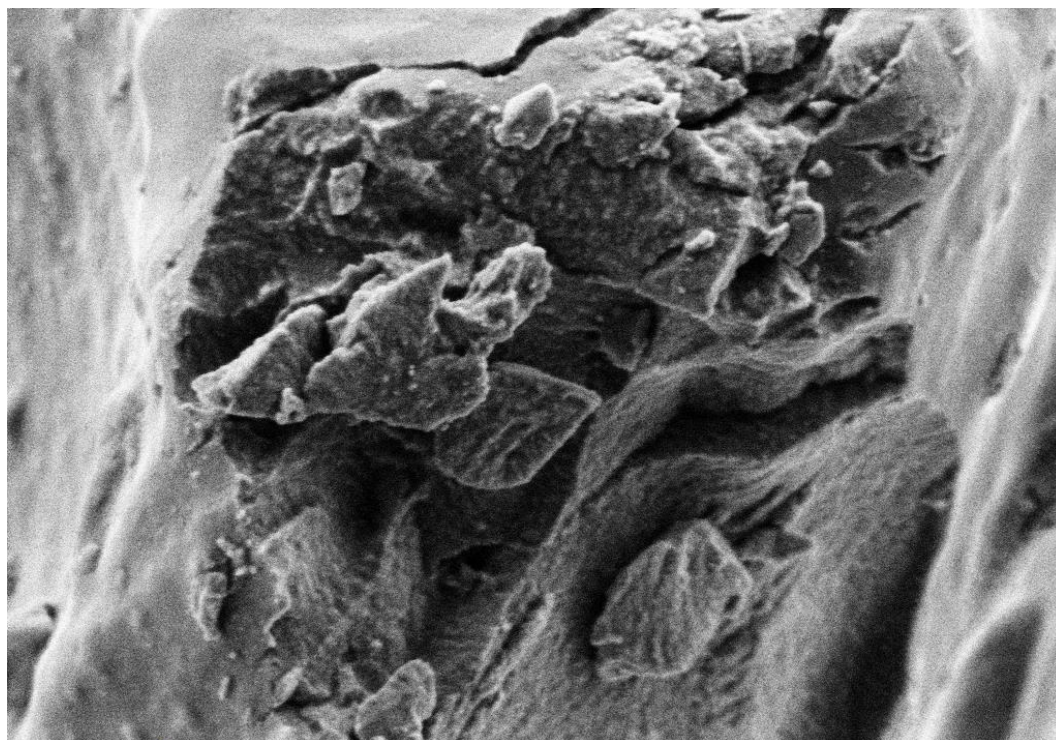

Mag = 20.00 K X  
 FIB Lock Mags = No  
 FIB Mag = 704 X  
 EHT = 2.00 kV  
 WD = 4.2 mm  
 Stage at Z = 38.426 mm  
 Stage at M = 4.693 mm  
 Image Pixel Size = 14.70 nm  
 Stage at T = 0.0 °  
 Signal A = SE2  
 Tilt Corr. = Off  
 Signal B = SE2  
 Tilt Angle = 0.0 °  
 Scan Rotation = 0.0 °  
 Mixing = Off  
 Mix Signal = 0.5000  
 Aperture No. = 1  
 FIB Blanked = Yes  
 FIB Probe = 30KV-500 pA  
 FIB Imaging = SEM

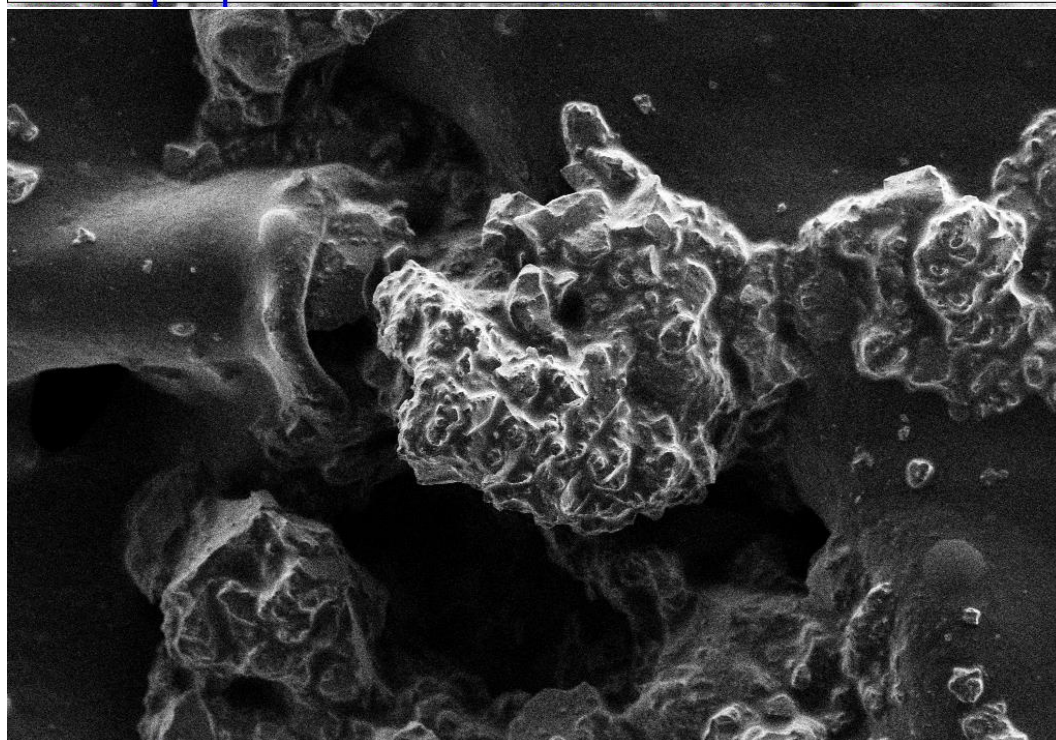

Mag = 1.00 K X  
 FIB Lock Mags = No  
 FIB Mag = 704 X  
 EHT = 2.00 kV  
 WD = 4.2 mm  
 Stage at Z = 38.426 mm  
 Stage at M = 4.693 mm  
 Image Pixel Size = 294.6 nm  
 Stage at T = 0.0 °  
 Signal A = SE2  
 Tilt Corr. = Off  
 Signal B = SE2  
 Tilt Angle = 0.0 °  
 Scan Rotation = 0.0 °  
 Mixing = Off  
 Mix Signal = 0.5000  
 Aperture No. = 1  
 FIB Blanked = Yes  
 FIB Probe = 30KV-500 pA  
 FIB Imaging = SEM



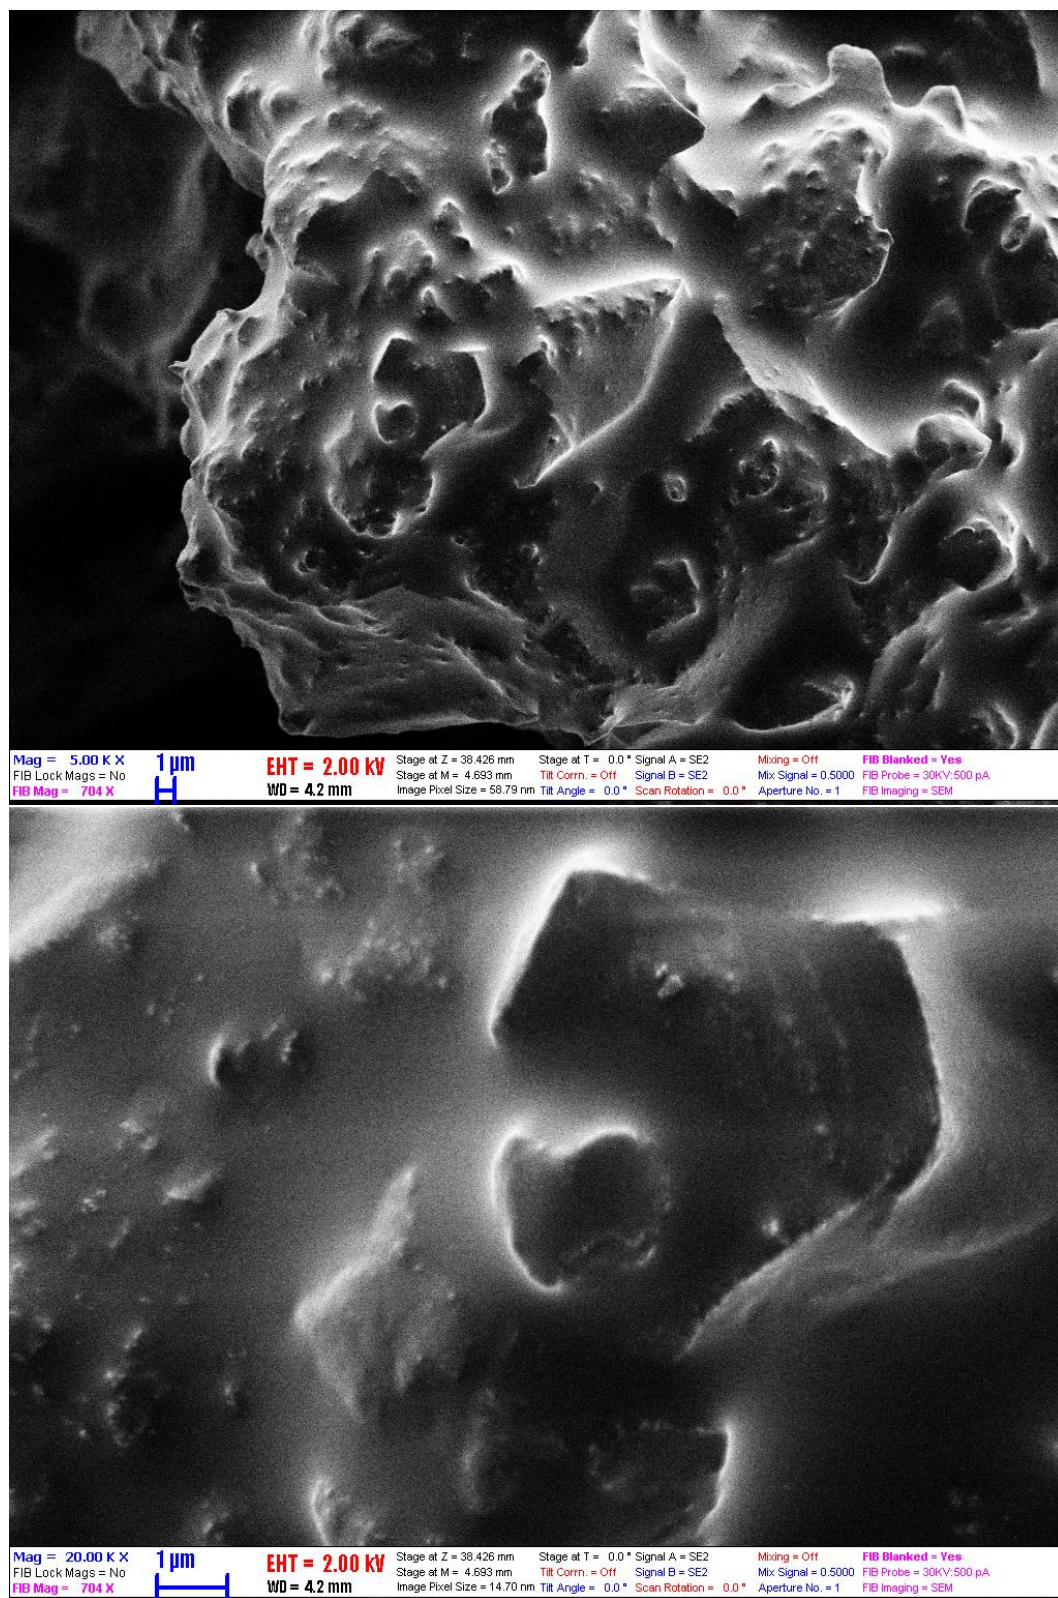

Figure S7 IM-BF4-0.5



## 2. EDS spectra of the IL – silica nanocomposites

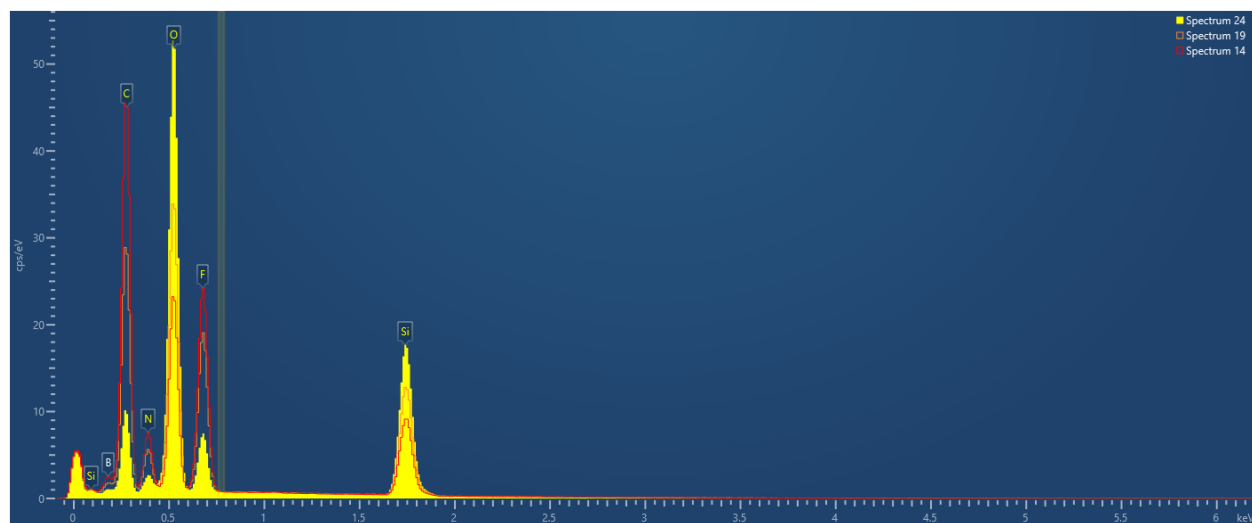

Figure S8 EDS spectra of samples **IM-BF4-0.1**, **IM-BF4-0.3**, **IM-BF4-0.5** .

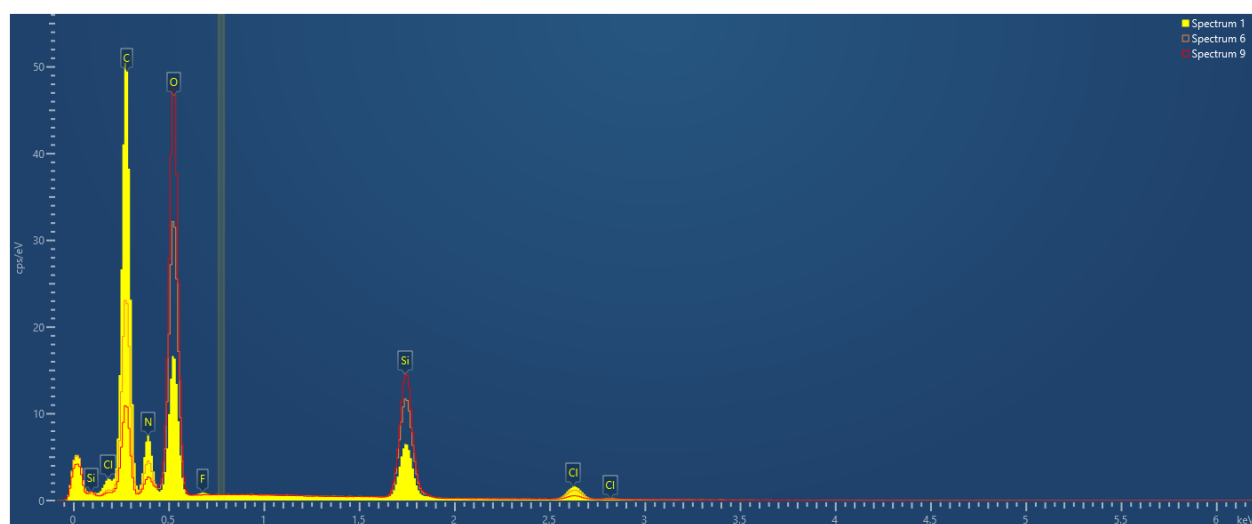

Figure S9 EDS spectra of samples **IM-Cl-0.1**, **IM-Cl-0.3**, **IM-Cl-0.5** .
